# Supplementary material for: 9-Hetero-10-boraanthracene-derived borinic acid catalysts for regioselective activation of polyols
Source: Royal Society of Chemistry journal article supplement (doi:10.1039/c3sc51172c), 2013-01-01

## 9-Hetero-10-boraanthracene-derived borinic acid catalysts for regioselective activation of polyols

Elena Dimitrijević and Mark S. Taylor\*

*Department of Chemistry, Lash Miller Laboratories, University of Toronto  
80 St. George St., Toronto ON M5S 3H6 Canada*

### Electronic Supplementary Information

**General:** Reactions were carried out without effort to exclude air or moisture, unless otherwise indicated. Stainless steel syringes were used to transfer air- and moisture-sensitive liquids. Flash chromatography was carried out using neutral silica gel from Silicycle.

**Materials:** All reagents and solvents were purchased from Sigma Aldrich, Caledon, Carbosynth or Alfa Aesar and used without further purification. Acetonitrile and THF were purified by passing through two columns of activated alumina under argon (Innovative Technology, Inc.). Nuclear magnetic resonance (NMR) solvents were purchased from Cambridge Isotope Laboratories. Diphenylborinic acid was prepared from 2-aminoethyl diphenylborinate according to a reported procedure.<sup>1</sup>

**Instrumentation:** <sup>1</sup>H and <sup>13</sup>C NMR spectra were recorded in CDCl<sub>3</sub> or DMSO-*d*<sub>6</sub> using either a Bruker Avance III 400 MHz, Varian Mercury 300 or 400 MHz, or Agilent 500 or 600 MHz spectrometer. <sup>1</sup>H NMR are reported in parts per million (ppm) relative to tetramethylsilane and referenced to residual protium in the solvent. Spectral features are tabulated in the following order: chemical shift ( $\delta$ , ppm); multiplicity (s-singlet, d-doublet, t-triplet, q-quartet, m-complex multiplet); number of protons; coupling constants (*J*, Hz). High-resolution mass spectra (HRMS) were obtained on a VS 70- 250S (double focusing) mass spectrometer at 70 eV. Infrared (IR) spectra were obtained on a Perkin-Elmer Spectrum 100 instrument equipped with a single-bounce diamond / ZnSe ATR accessory, either in the solid state or as neat liquids, as indicated. Spectral features are tabulated as follows: wavenumber (cm<sup>-1</sup>); intensity (s-strong, m-medium, w-weak, br-broad). Optical absorption spectra were collected at room temperature on a Perkin-Elmer Lambda 35 spectrometer using 10 mm quartz cuvettes and corrected for background signal with a solvent-filled quartz cuvette. pH measurements were performed on a EcoMet P25 pH meter with a glass electrode. All solutions were prepared in 10 mM HEPES buffer in distilled water:methanol (1:3) and adjusted to pH 7.4.

---

<sup>1</sup> Lee, D.; Newman, S. G.; Taylor, M. S. *Org. Lett.* **2009**, *11*, 5486–5489.

## I. Experimental and Characterization Data

### Catalyst Synthesis

**General procedure A.** Procedure adapted from Letsinger and Nazy.<sup>2</sup> To an oven-dried Schlenk flask, equipped with a magnetic stirring bar, the corresponding organolithium or organomagnesium reagent (1 equiv.) was dropwise added over 1 h to a 0.6 M solution of phenylboronic acid 1,3-propanediol ester in anhydrous diethyl ether under argon, at -78 °C. After stirring the resulting suspension for 1 h at that temperature, it was allowed to warm to room temperature overnight. 4 N HCl was added and the solution stirred under argon for 20 minutes. The aqueous layer was then removed *via* syringe, maintaining the remaining solution under argon. The ethereal layer was washed with water. A 0.007 M solution containing 2.5 equivs. of 2-aminoethanol in methanol was added *via* syringe, and the resulting suspension was stirred overnight. Following this (the reaction could be exposed to air at this point), water was added and the ethereal layer was removed using a rotary evaporator to crash out the product as a white solid, which could then be filtered and dried.

**2-Methyl-2-phenyl-1,3,2-oxazaborolidin-3-ium-2-uide.** Synthesized according to general procedure A using MeMgBr in 43% yield as a white solid, in agreement with previous reports.<sup>2</sup> **<sup>1</sup>H NMR (400 MHz; CD<sub>3</sub>OD):** δ 7.39 (d, *J* = 7.0 Hz, 1H), 7.30 (d, *J* = 7.3 Hz, 1H), 7.14-7.11 (m, 2H), 7.02-6.99 (m, 1H), 3.72 (t, *J* = 5.1 Hz, 2H), 3.35 (s, 3H), 2.97 (t, *J* = 5.0 Hz, 2H).

**2-Butyl-2-phenyl-1,3,2-oxazaborolidin-3-ium-2-uide.** Synthesized according to general procedure A using *n*-butyllithium in 50% yield, white solid. **<sup>1</sup>H NMR (400 MHz; CDCl<sub>3</sub>):** δ 7.42 (d, *J* = 6.7 Hz, 2H), 7.30-7.25 (m, 2H), 7.19 (dd, *J* = 9.4, 5.1 Hz, 1H), 3.98 (t, *J* = 6.2 Hz, 2H), 3.73 (br, 2H), 2.98 (br, 2H), 1.28 (tt, *J* = 7.2, 7.2 Hz, 2H), 1.18-1.10 (m, 2H), 0.83 (t, *J* = 7.2 Hz, 3H), 0.60-0.56 (m, 2H). **<sup>13</sup>C NMR (75 MHz; CDCl<sub>3</sub>):** δ 131.15, 127.73, 126.22, 63.37, 42.35, 28.42, 26.66, 14.31, 12.85. **IR (powder, cm<sup>-1</sup>):** 3330 (w), 2960 (m), 2915 (m), 2867 (m), 1612 (m), 1430 (w), 1210 (m), 1172 (m), 1069 (s), 946 (m), 737 (s), 700 (s). **HRMS (DART, m/z):** Calculated for C<sub>12</sub>H<sub>21</sub>BNO [(M+H)<sup>+</sup>]: 206.17162. Found: 206.17197.

**2-(*sec*-Butyl)-2-phenyl-1,3,2-oxazaborolidin-3-ium-2-uide.** Synthesized according to general procedure A using *sec*-butyllithium. Isolated as a diastereomeric mixture in 18% yield, white solid. Major diastereoisomer: **<sup>1</sup>H NMR (400 MHz; CDCl<sub>3</sub>):** δ 7.41-7.36 (m, 2H), 7.30-7.26 (m, 2H), 7.18 (tt, *J* = 7.2, 1.8 Hz, 1H), 3.93 (t, *J* = 6 Hz, 2H), 3.79-3.77 (br, 2H), 2.98 (t, *J* = 6.0 Hz, 2H), 1.40-1.34 (m, 1H), 0.90-0.97 (m, 1H), 0.86 (t, *J* = 7.1 Hz, 3H), 0.79 (d, *J* = 7.1 Hz, 3H), 0.58-0.52 (m, 1H). **<sup>13</sup>C NMR (125 MHz; CDCl<sub>3</sub>):** δ 131.24, 127.75, 127.57, 126.00, 63.31, 42.62, 26.23, 15.23, 13.91, 10.12. **IR (powder, cm<sup>-1</sup>):** 3288 (w), 2957 (m), 2868 (m), 1606 (m), 1452 (w), 1168 (m), 1075 (s), 1057 (s), 896 (m), 740 (s), 700 (s). **HRMS (ESI+, m/z):** Calculated for C<sub>12</sub>H<sub>21</sub>BNO [(M+H)<sup>+</sup>]: 206.1713. Found: 206.1713.

<sup>2</sup> Letsinger, R. L.; Nazy, J. R. *J. Org. Chem.* **1958**, *23*, 914–915.

**General procedure B.** Procedure adapted from previous reports.<sup>3</sup> To an oven-dried Schlenk flask, equipped with a magnetic stirring bar, *n*-butyllithium (2 M in hexanes, 2.11 equiv.) was dropwise added to a 1.26 M solution of diphenyl ether (1 equiv) in anhydrous THF under argon, at -30 °C. After stirring the resulting suspension overnight (-30 °C - 23 °C), tributyl borate (1.5 equiv) was added. The resulting solution was heated to reflux for 2 h. Upon cooling to room temperature, 4 N HCl was added, and the mixture was stirred for 30 minutes at 23 °C. The two phases were separated and the organic phase was washed with water, dried over MgSO<sub>4</sub> and concentrated *in vacuo*. The resulting crude material was recrystallized using the given conditions.

**10H-Dibenzo[*b,e*][1,4]thiaborinin-10-ol (2a).** Synthesized according to general procedure B from diphenyl sulfide. Recrystallization from hot toluene yielded the title compound as a fine, white powder, 20% yield. <sup>1</sup>H NMR (300 MHz; DMSO-*d*<sub>6</sub>): δ 9.88 (s, 1H, BOH), 8.36 (ddd, *J* = 7.8, 1.5, 0.9 Hz, 2H), 7.60-7.57 (m, 4H), 7.39 (ddd, *J* = 7.8, 5.7, 2.6 Hz, 2H). <sup>13</sup>C NMR (75 MHz; DMSO-*d*<sub>6</sub>): δ 142.98, 133.80, 131.19, 125.11, 124.51, 45.77. IR (powder, cm<sup>-1</sup>): 1590 (m), 1422 (s), 1301 (s), 1113 (m), 1069 (m), 1032 (m), 895 (m). HRMS (DART, *m/z*): Calculated for C<sub>12</sub>H<sub>10</sub>BOS [(M+H)<sup>+</sup>]: 213.05454. Found: 213.05437. mp >300 °C (toluene).

**10H-Dibenzo[*b,e*][1,4]oxaborinin-10-ol (2b).** Synthesized according to general procedure B from diphenyl ether. Recrystallization from hot toluene yielded the title compound as a white, fluffy solid, 61% yield (combined yield of 3 consecutive recrystallizations of the mother liquor). <sup>1</sup>H NMR (300 MHz; DMSO-*d*<sub>6</sub>): δ 9.85 (s, 1H, BOH), 8.14 (ddd, 2H, *J* = 7.5, 1.8, 0.3 Hz, 2H), 7.67 (ddd, *J* = 8.4, 7.2, 1.8 Hz, 2H), 7.42 (ddd, *J* = 8.4, 0.9, 0.3 Hz, 2H), 7.28 (ddd, *J* = 7.5, 7.2, 0.9 Hz, 2H). <sup>13</sup>C NMR (75 MHz; DMSO-*d*<sub>6</sub>): δ 160.74, 133.26, 131.92, 122.19, 117.11, 45.77. IR (powder, cm<sup>-1</sup>): 3292 (br), 1607 (m), 1470 (s), 1334 (s), 1221 (m), 1136 (m), 907 (m). HRMS (DART, *m/z*): Calculated for C<sub>12</sub>H<sub>10</sub>BO<sub>2</sub> [(M+H)<sup>+</sup>]: 197.07738. Found: 197.07721. mp = 290–295 °C (toluene).

**Bis(2-bromophenyl)amine.** Synthesized according to a previous report from 2-bromiodobenzene and 2-bromoaniline, 96% yield. Spectral data were in agreement with previous reports.<sup>4</sup>

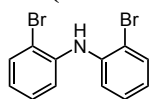

**2-Bromo-*N*-(2-bromophenyl)-*N*-methylaniline.** Synthesized according to a previous report from bis(2-bromophenyl)amine, 89% yield. Spectral data were in agreement with previous reports.<sup>4</sup>

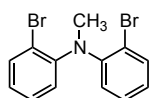

<sup>3</sup> Maitlis, P. M. *J. Chem. Soc.* **1961**, 425–429. Davidson, J. M.; French, C. M. *J. Chem. Soc.* **1960**, 191–195.

<sup>4</sup> Uchiyama, M.; Matsumoto, Y.; Nakamura, S.; Ohwada, T.; Kobayashi, N.; Yamashita, N.; Matsumiya, A.; Sakamoto, T. *J. Am. Chem. Soc.* **2004**, *126*, 8755–8759.

**5-Methyldibenzo[*b,e*][1,4]azaborinin-10(5*H*)-ol (2c).** Synthesized according to general procedure B from 2-bromo-*N*-(2-bromophenyl)-*N*-methylaniline. Recrystallization from 2:1 pentane:dichloromethane yielded the title compound as a white solid, 55% yield (combined yield of 2 consecutive recrystallizations). <sup>1</sup>H NMR (300 MHz; DMSO-*d*<sub>6</sub>): δ 9.00 (s, 1H, BOH), 8.22 (ddd, *J* = 7.5, 1.8, 0.6 Hz, 2H), 7.64 (ddd, *J* = 8.7, 6.8, 1.8 Hz, 2H), 7.57 (d, *J* = 8.5 Hz, 2H), 7.12 (ddd, *J* = 7.5, 6.8, 0.9 Hz, 2H), 3.79 (s, 3H, NCH<sub>3</sub>). <sup>13</sup>C NMR (75 MHz; DMSO-*d*<sub>6</sub>): δ 148.32, 132.10, 131.96, 118.62, 114.83, 34.97. IR (powder, cm<sup>-1</sup>): 3337 (br), 1600 (s), 1470 (s), 1354(s), 1232 (m), 1122 (s), 1042 (m), 903 (m). HRMS (DART, *m/z*): Calculated for C<sub>13</sub>H<sub>13</sub>BNO [(M+H)<sup>+</sup>]: 210.10902. Found: 210.10925. mp = 297–300 °C (pentane / dichloromethane).

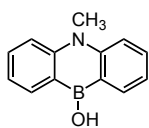

### Sulfonylation

**General procedure C.** Diol (1 equiv) and 4-toluenesulfonyl chloride (1.5 equiv) were transferred to a 5-dram vial equipped with a magnetic stirring bar. Anhydrous acetonitrile, *N,N*-diisopropylethylamine (1.5 equiv) and a solution of catalyst **2b** (0.1 mol %) were added (final reaction concentration was 0.2 M). The resulting mixture was capped and stirred under ambient atmosphere and temperature for 24 hours. The reaction was quenched with methanol, concentrated *in vacuo* and purified by silica gel chromatography.

**Reaction monitoring (Fig. 5).** General procedure C was used with 1-phenyl-1,2-ethanediol (138.2 mg, 1.0 mmol), 4-toluenesulfonyl chloride (190.7 mg, 1.0 mmol), 1,3,5-trimethoxybenzene (56.1 mg, 0.33 mmol) and *N,N*-diisopropylethylamine (174.2 μL, 1.0 mmol). This was performed for each of the four catalysts (**1a**, **2a-c**, 0.1 mol %). 100 μL aliquots, taken at the given time intervals, were quenched with methanol and concentrated *in vacuo*. <sup>1</sup>H NMR data were collected for each aliquot and the conversions obtained using 1,3,5-trimethoxybenzene were tabulated.

**2-Hydroxy-2-phenylethyl 4-toluenesulfonate (3a).** Synthesized according to general procedure C from 1-phenyl-1,2-ethanediol. The resulting crude material was purified by silica gel chromatography (30% EtOAc/pentane), 90% yield, colorless oil. The spectral data were in agreement with previous reports.<sup>5</sup>

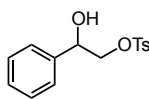

**2-hydroxypropyl 4-methylbenzenesulfonate (3b).** Synthesized according to general procedure C from propylene glycol. The resulting crude material was purified by silica gel chromatography (30% EtOAc/pentane), 95% yield, white solid. The spectral data were in agreement with previous reports.<sup>6</sup>

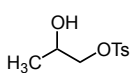

<sup>5</sup> Uccello-Barretta, G.; Cuzzola, A.; Balzano, F.; Menicagli, R.; Iuliano, A.; Salvadori, P. *J. Org. Chem.* **1997**, *62*, 827–835.

<sup>6</sup> Huszthy, P.; Oue, M.; Bradshaw, J. S.; Zhu, C. Y.; Wang, T.; Dalley, N. K.; Curtis, J. C.; Izatt, R. M. *J. Org. Chem.* **1992**, *57*, 5383–5394.

## Alkylation

**General procedure D (Table 1).** Pyranoside (1 equiv), silver (I) oxide (1.5 equiv) and catalyst (**2b**, 5 mol %) were transferred to a 5-dram vial, equipped with a magnetic stirring bar. The vial was sealed with a septum and purged with a balloon of argon. Anhydrous acetonitrile (0.1 M) and benzyl bromide (1.5 equiv) were added and the reaction stirred at 40 °C for 24 h. The reaction was quenched with methanol, filtered over a plug of Celite and concentrated *in vacuo*. The resulting crude material was purified by silica gel chromatography.

**Reaction monitoring.** General procedure D was used with methyl- $\alpha$ -L-rhamnopyranoside and each of the catalysts (**1a**, **2a-c**). The reactions were stopped after stirring at 40 °C for 6 h. Following work-up, the resulting crude material was purified by silica gel chromatography (40% EtOAc/pentane). Isolated yields obtained with each catalyst are shown in Table S1. Regiomeric ratio of *O3*:*O2* alkylated products is indicated in parentheses.

**Table S1.** Methyl- $\alpha$ -L-rhamnopyranoside benzylation catalyzed by **1a**, **2a-c**.

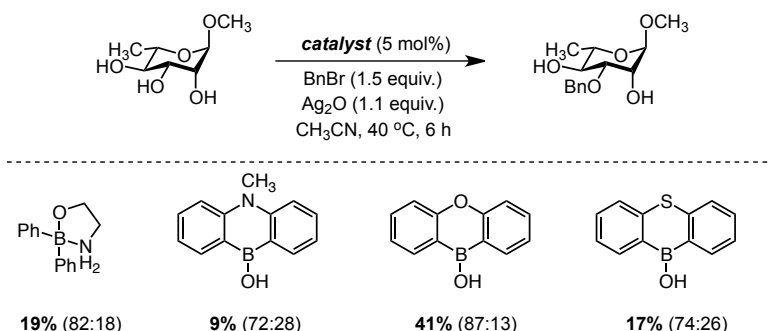

**Methyl-3-O-benzyl- $\alpha$ -L-rhamnopyranoside (4a).** Synthesized according to general procedure D from methyl- $\alpha$ -L-rhamnopyranoside. Purified using 40% EtOAc/pentane, 92% yield (isolated as an 8:1 mixture of regioisomers), white solid. Spectral data are in agreement with previous reports.<sup>7</sup>

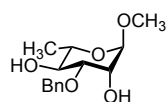

**Methyl-6-(*tert*-butyldimethylsilyloxy)-3-O-benzyl- $\alpha$ -D-mannopyranoside (4b).** Synthesized according to general procedure D from methyl-6-(*tert*-butyldimethylsilyloxy)- $\alpha$ -D-mannopyranoside. Purified using 25% EtOAc/pentane, 82% yield (+12% yield of regioisomer), pale yellow solid. Spectral data are in agreement with previous reports.<sup>7</sup>

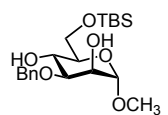

**Methyl-3-O-benzyl- $\beta$ -D-arabinopyranoside (4c).** Synthesized according to general procedure D from methyl- $\beta$ -D-arabinopyranoside. Purified using 60% EtOAc/pentane, 63% yield, white solid. Spectral data are in agreement with previous reports.<sup>7</sup>

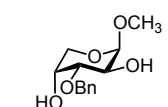

<sup>7</sup> Chan, L.; Taylor, M. S. *Org. Lett.* **2011**, *13*, 3090–3093.

**Methyl-3-*O*-benzyl- $\alpha$ -L-fucopyranoside (4d).** Synthesized according to general procedure D from methyl- $\alpha$ -L-fucopyranoside. Purified using 40% EtOAc/pentane, 81% yield, pale yellow solid. Spectral data are in agreement with previous reports.<sup>7</sup>

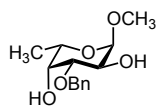

### Glycosylation

**General procedure E (Table 2).** Glycosyl donor (1 equiv.), acceptor (1.1 equiv.), silver (I) oxide (1 equiv.) and catalyst (**2c**, 10 mol %) were added to a 5-dram vial, equipped with a magnetic stirring bar. The vial was capped and purged with argon. Anhydrous acetonitrile (0.13 M) was added and the resulting mixture was stirred at room temperature for 16 hours. The reaction was quenched with a few drops of methanol, diluted with dichloromethane and filtered through a plug of Celite. The resulting crude material was purified by silica gel chromatography.

**Reaction monitoring.** 2,3,4,6-Tetra-*O*-acetyl- $\alpha$ -D-glucopyranosyl bromide (329.0 mg, 0.8 mmol), methyl-6-*O*-*tert*-butyldimethylsilyl- $\alpha$ -D-mannopyranoside (259.1 mg, 0.88 mmol), silver (I) oxide (185.4 mg, 0.8 mmol), 1,3,5-trimethoxybenzene (44.9 mg, 0.267 mmol) and catalyst (0.032 mmol, 4 mol %) were added to an oven-dried round bottom flask, equipped with a magnetic stirring bar, under argon. Anhydrous acetonitrile (6.2 mL) was added and the reaction stirred at 750 rpm for 24 hours. This was performed for each of the three catalysts (**2a-c**). Aliquots (100  $\mu$ L) were taken at the given time points, quenched with methanol, diluted with dichloromethane and filtered over a Celite plug. Conversion to product was determined by <sup>1</sup>H NMR using the added 1,3,5-trimethoxybenzene as an internal standard (Figure S1).

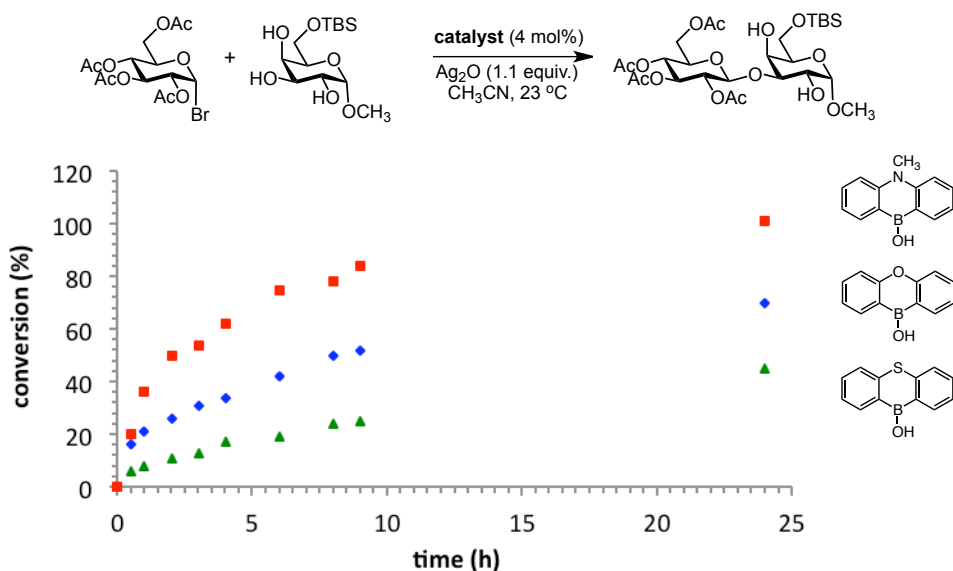

**Figure S1.** Glycosylation using catalysts **2a-c**.

**Methyl-6-*O*-*tert*-butyldimethylsilyl-3-*O*-(2',3',4',6'-tetra-*O*-acetyl-β-D-**

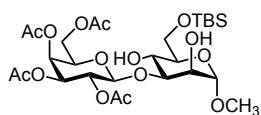

**galactopyranosyl)-α-D-mannopyranoside (5a).** Synthesized according to general procedure E, from 2,3,4,6-tetra-*O*-acetyl-α-D-galactopyranosyl bromide and methyl-6-*O*-*tert*-butyldimethylsilyl-α-D-mannopyranoside. Purified using gradient 10-45%

EtOAc/pentane (40% EtOAc/pentane:  $R_f$  (catalyst) = 0.7,  $R_f$  (product) = 0.16), 81% yield, white solid (catalyst isolated in >95% yield). Spectral data are in agreement with previous reports.<sup>8</sup>

**Methyl-6-*O*-*tert*-butyldimethylsilyl-3-*O*-(2',3',4',6'-tetra-*O*-acetyl-β-D-**

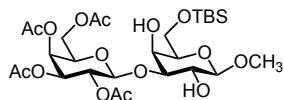

**galactopyranosyl)-β-D-galactopyranoside (5b).** Synthesized according to general procedure E, from 2,3,4,6-tetra-*O*-acetyl-α-D-galactopyranosyl bromide and methyl-6-*O*-*tert*-

butyldimethylsilyl-β-D-galactopyranoside. Purified using gradient 10-60% EtOAc/pentane (40% EtOAc/pentane:  $R_f$  (catalyst) = 0.7,  $R_f$  (product) = 0.11), 82% yield, white solid (catalyst isolated in 48% yield). <sup>1</sup>H NMR (500 MHz; CDCl<sub>3</sub>): δ 5.39 (dd,  $J$  = 3.5, 1.0 Hz, 1H,  $H$ -4'), 5.23 (dd,  $J$  = 10.5, 7.9 Hz, 1H,  $H$ -2'), 5.05 (dd,  $J$  = 10.5, 3.5 Hz, 1H,  $H$ -3'), 4.80 (d,  $J$  = 8.0 Hz, 1H,  $H$ -1'), 4.15-4.11 (m, 3H,  $H$ -1,  $H$ -6'), 4.03 (dd,  $J$  = 3.3, 1.1 Hz, 1H,  $H$ -4), 3.93-3.89 (m, 2H,  $H$ -5',  $H$ -6<sub>A</sub>), 3.82 (dd,  $J$  = 10.0, 5.5 Hz, 1H,  $H$ -6<sub>B</sub>), 3.75 (dd,  $J$  = 9.5, 7.5 Hz, 1H,  $H$ -2), 3.58 (dd,  $J$  = 9.5, 3.3 Hz, 1H,  $H$ -3), 3.53 (s, 3H, OCH<sub>3</sub>), 3.50-3.47 (m, 1H,  $H$ -5), 2.16 (s, 3H, COCH<sub>3</sub>), 2.05 (s, 3H, COCH<sub>3</sub>), 2.04 (s, 3H, COCH<sub>3</sub>), 1.99 (s, 3H, COCH<sub>3</sub>), 0.89 (s, 9H, Si(C(CH<sub>3</sub>)<sub>3</sub>)(CH<sub>3</sub>)<sub>2</sub>), 0.07 (s, 6H, Si(C(CH<sub>3</sub>)<sub>3</sub>)(CH<sub>3</sub>)<sub>2</sub>). <sup>13</sup>C NMR (126 MHz; CDCl<sub>3</sub>): δ 170.45, 170.34, 170.24, 170.09, 103.82, 102.03, 82.86, 74.81, 70.95, 70.86, 70.63, 69.08, 67.81, 66.90, 62.07, 61.14, 57.00, 25.98, 20.92, 20.81, 20.77, 20.72, 18.45, -5.26, -5.21. IR (powder, cm<sup>-1</sup>): 3473 (br), 2931 (br), 1741 (s), 1368 (m), 1216 (s), 1042 (s), 835 (m). HRMS (ESI,  $m/z$ ): Calculated for C<sub>27</sub>H<sub>50</sub>NO<sub>15</sub>Si [(M+NH<sub>4</sub>)<sup>+</sup>]: 656.2944. Found: 656.2946.

**Methyl-3-*O*-(2',3',4',6'-tetra-*O*-acetyl-β-D-galactopyranosyl)-β-D-arabinopyranoside**

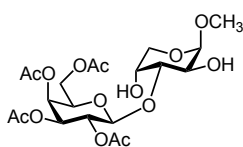

**(5c).** Synthesized according to general procedure E, from 2,3,4,6-tetra-*O*-acetyl-α-D-galactopyranosyl bromide and methyl-β-D-arabinopyranoside. Purified using gradient 10-80% EtOAc/pentane (40% EtOAc/pentane:  $R_f$  (catalyst) = 0.7,  $R_f$  (product) = 0.03), 86% yield, white solid (catalyst isolated in 70% yield).

Spectral data are in agreement with previous reports.<sup>8</sup>

**Methyl-6-*O*-*tert*-butyldimethylsilyl-3-*O*-(2',3',4',6'-tetra-*O*-acetyl-β-D-**

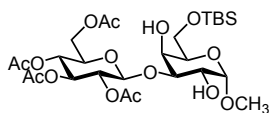

**glucopyranosyl)-α-D-galactopyranoside (5d).** Synthesized according to general procedure E, from 2,3,4,6-tetra-*O*-acetyl-α-D-glucopyranosyl bromide and methyl-6-*O*-*tert*-butyldimethylsilyl-α-D-galactopyranoside. Purified using 50-70%

EtOAc/pentane (40% EtOAc/pentane:  $R_f$  = 0.15), 69% yield, white solid. Spectral data are in agreement with previous reports.<sup>8</sup>

<sup>8</sup> Gouliaras, C.; Lee, D.; Chan, L.; Taylor, M. S. *J. Am. Chem. Soc.* **2011**, *133*, 13926–13929.

**Methyl-6-*O*-*tert*-butyldimethylsilyl-3-*O*-(2',3',4',6'-tetra-*O*-acetyl- $\beta$ -D-glucofuranosyl)- $\beta$ -D-galactopyranoside (5e).** Synthesized according to general procedure E, from 2,3,4,6-tetra-*O*-acetyl- $\alpha$ -D-glucofuranosyl bromide and methyl-6-*O*-*tert*-butyldimethylsilyl- $\beta$ -D-galactopyranoside. Purified using 50-70% EtOAc/pentane (40% EtOAc/pentane:  $R_f$  = 0.14), 84% yield, white solid. Spectral data are in agreement with previous reports.<sup>8</sup>

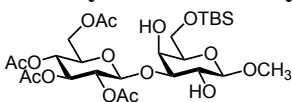

**Control experiments of catalyst stability.** Catalyst (0.02 mmol) and silver (I) oxide (0.2 mmol) were added to a 2-dram vial containing a magnetic stirring bar under argon. 2 mL of anhydrous acetonitrile were added and the resulting solution was stirred vigorously at room temperature. After 4 hours, the reactions were quenched by the addition of methanol, diluted with dichloromethane, filtered through a Celite plug and concentrated *in vacuo*. The resultant NMRs (red) were compared to those of the authentic product (green) (Figure S2).

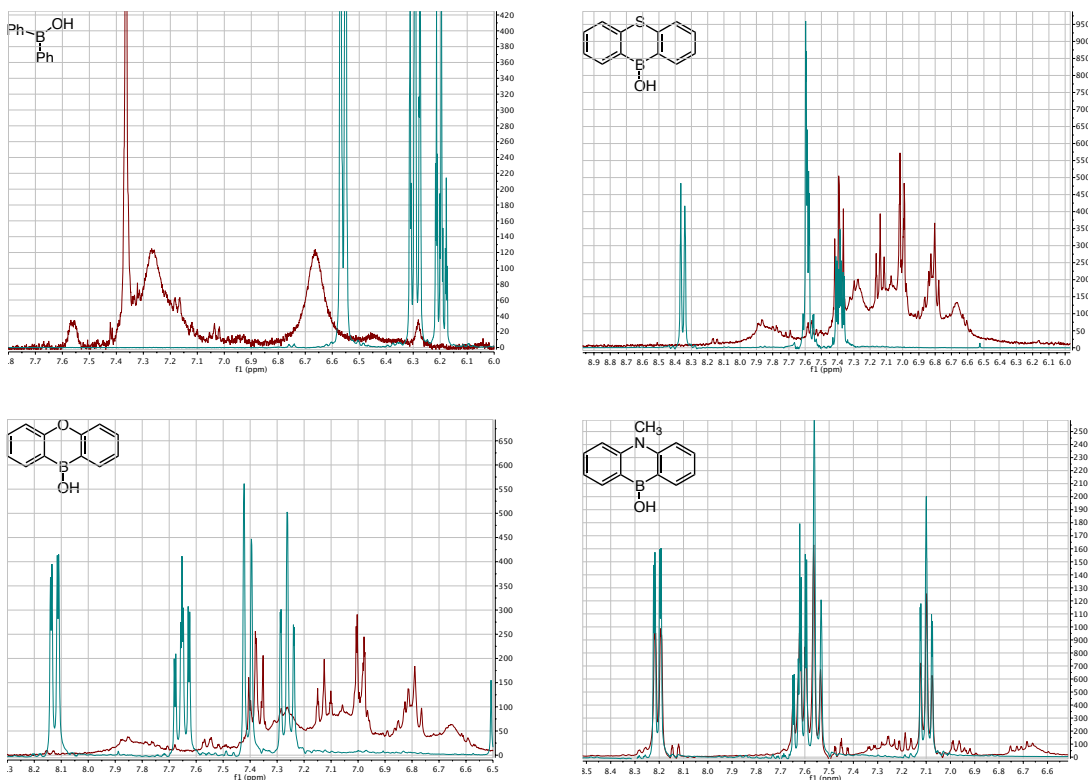

**Figure S2.** Catalyst stability under glycosylation conditions.



## II. UV-Vis Titration Data

Optical absorption spectra were collected at room temperature on a Perkin-Elmer Lambda 35 spectrometer using 10 mm quartz cuvettes and corrected for background signal with a solvent-filled quartz cuvette. All solutions were prepared in 10 mM HEPES buffer in distilled water:methanol (1:3) and adjusted to pH 7.4. Binding constants were determined by measuring the change in absorbance of solutions containing various concentrations of analyte.

A solution of the catalyst (host) was prepared (solution **A**). This solution was then used as the parent solution to prepare a guest (catechol) solution (solution **B**). Titration experiments were carried out by sequentially adding aliquots of solution **B** by syringe to 2.5 mL of solution **A**. The solution was stirred for 30 seconds prior to obtaining absorption spectra. Concentrations of host were chosen to yield data such that the occupancy ratio  $\beta = [\text{complex}]/[\text{guest}]_{\text{total}}$  would fall in the range  $0.2 < \beta < 0.8$  as described by Hirose.<sup>9</sup> Graphs of  $\Delta A$  (change in absorbance at 350 nm for **2a**, 320 nm for **2b** and 372 nm for **2c**) against  $[\text{catechol}]$  were curve-fitted to a 1:1 binding isotherm (eq. 1), using Igor Pro 5.0 (WaveMetrics, Inc.):

$$A_{\text{obs}} = A_{\text{H}} + \Delta\epsilon \left[ \frac{\kappa[\text{H}]_{\text{t}}[\text{G}]}{1 + \kappa[\text{G}]} \right] \quad (1)$$

$A_{\text{obs}}$  is the observed absorbance,  $A_{\text{H}}$  is the absorbance of the unbound catalyst,  $\Delta\epsilon = \epsilon_{\text{HG}} - \epsilon_{\text{H}}$  ( $\epsilon_{\text{HG}}$  and  $\epsilon_{\text{H}}$  are the molar absorption coefficients of the host-guest (catalyst-catechol) complex and the catalyst, respectively),  $[\text{H}]_{\text{t}}$  is the total concentration of catalyst and  $[\text{G}]$  is defined by the quadratic:

$$K[\text{G}]^2 + (K[\text{H}]_{\text{t}} - K[\text{G}]_{\text{t}} + 1)[\text{G}] - [\text{G}]_{\text{t}} = 0 \quad (2)$$

where  $[\text{H}]_{\text{t}}$  is the total host concentration. Initially estimated values for the parameters  $A_{\text{H}}$ ,  $\Delta\epsilon$  and  $K$  allowed for the determination of the value of  $[\text{H}]$  from the positive quadratic root of equation (2). Subsequent iterative nonlinear curve-fitting of the experimental  $\Delta A$  vs.  $[\text{H}]_{\text{t}}$  to equation (1) at a known  $[\text{G}]_{\text{t}}$  was then applied resulting in refinement of the parameters and yielding values for  $A_{\text{H}}$ ,  $\Delta\epsilon$  and  $K$ .

Equations were derived as follows:

The equilibrium between the host and guest is described by equation (3):

$$K = \frac{[\text{HG}]}{[\text{H}][\text{G}]} \quad (3)$$

where  $[\text{HG}]$ ,  $[\text{H}]$  and  $[\text{G}]$  are the concentrations of host-guest complex, unbound host and unbound guest, respectively, and  $K$  is the host-guest equilibrium constant. The mass

---

<sup>9</sup> Hirose, K. J. *Inclusion Phenom. Macrocyclic Chem.* **2001**, *39*, 193–209.

balance equations for the host and guest are described by equations (4) and (5):

$$[H]_t = [H] + [HG] \quad (4)$$

$$[G]_t = [G] + [HG] \quad (5)$$

where  $[H]_t$  and  $[G]_t$  are the total concentrations of host and guest, respectively.

Solving equation (4) for  $[H]$  and equation (5) for  $[HG]$ , substituting into equation (3), expanding, rearranging and collecting like terms yields the quadratic equation (2).

By applying the Beer-Lambert Law to the complexed system, and substituting a cell length of 1 cm, equation (6) can be obtained, which describes the observed absorbance with respect to the host and host-guest concentrations.

$$A_{\text{obs}} = \epsilon_H[H] + \epsilon_{HG}[HG] \quad (6)$$

$A_{\text{obs}}$  is the observed absorbance at a given wavelength and  $\epsilon_H$  and  $\epsilon_{HG}$  are the molar absorption coefficients of the host and host-guest complex, respectively.

Solving equation (4) for  $[H]$ , substituting into equation (6), expanding and collecting like terms yields equation (7).

$$A_{\text{obs}} = \epsilon_H[H]_t + (\epsilon_{HG} - \epsilon_H)[HG] \quad (7)$$

Substituting for the absorbance of the unbound host,  $A_H$ , and defining  $\Delta\epsilon = \epsilon_{HG} - \epsilon_H$  yields equation (8).

$$A_{\text{obs}} = A_H + \Delta\epsilon[HG] \quad (8)$$

Solving equation (4) for  $[H]$ , substituting into equation (3), expanding and rearranging in terms of  $[HG]$  yields equation (9),

$$[HG] = \left| \frac{\kappa[G]_t[H]_t}{1 + \kappa[G]} \right| \quad (9)$$

which upon substitution into equation (8) yields equation (1).

Changes in absorbance  $\Delta A$  are plotted against substrate concentration (M). The curves obtained by fitting to a 1:1 or competitive binding isotherm are shown.

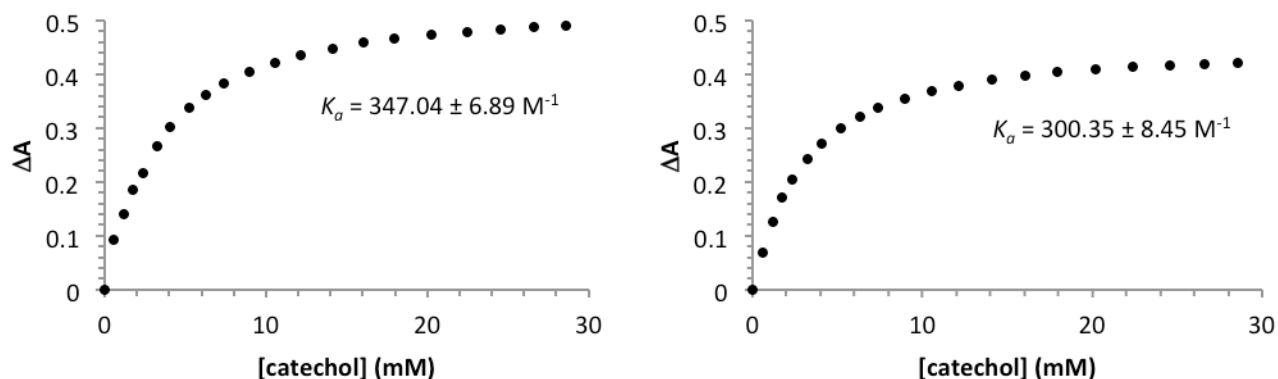

**Figure S3.** UV-vis titration of **2a** (0.15 mM) with catechol and the corresponding 1:1 binding isotherms (10 mM HEPES buffered MeOH:H<sub>2</sub>O (3:1) solution, pH 7.4, 295 K). Two trials shown.

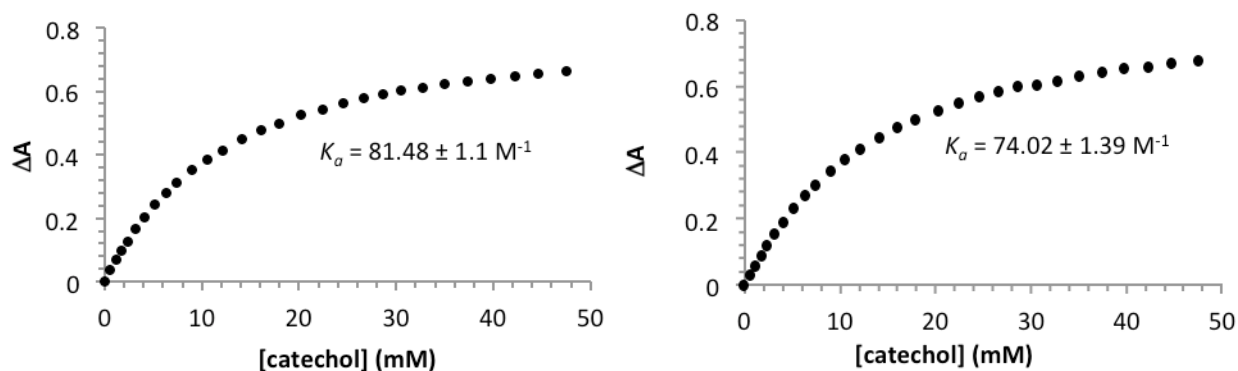

**Figure S4.** UV-vis titration of **2b** (0.15 mM) with catechol and the corresponding 1:1 binding isotherms (10 mM HEPES buffered MeOH:H<sub>2</sub>O (3:1) solution, pH 7.4, 295 K). Two trials shown.

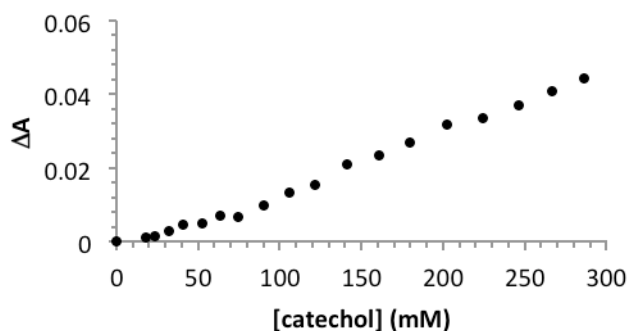

**Figure S5.** UV-vis titration of **2c** (0.05 mM) with catechol and the corresponding 1:1 binding isotherms (10 mM HEPES buffered MeOH:H<sub>2</sub>O (3:1) solution, pH 7.4, 295 K).

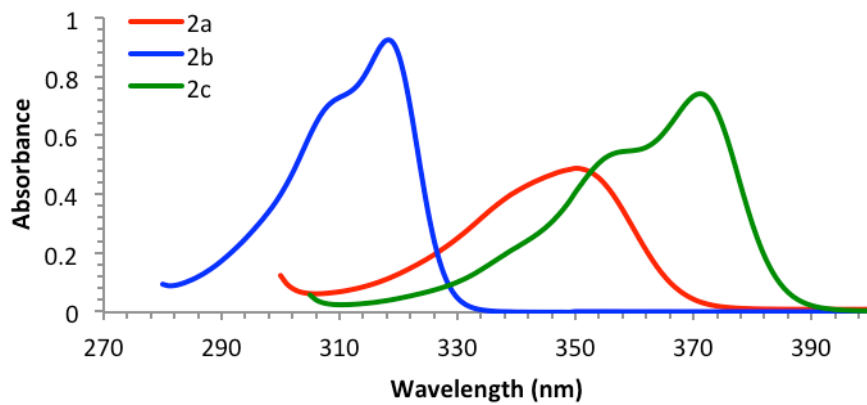

**Figure S6.** Absorption spectra of catalysts **2a-c** in 10 mM HEPES buffered MeOH:H<sub>2</sub>O (3:1) solution, pH 7.4, 295 K.

### III. Kinetic Data

Using **2b** as catalyst, the reaction progression was monitored by  $^1\text{H}$  NMR at room temperature. The conversion of 1,2-*cis*-cyclohexanediol (0.2 mmol) to product was monitored using 5.0 equivalents (1 mmol) each of 4-toluenesulfonyl chloride and *N,N*-diisopropylethylamine, and 3 mol % **2b** in 0.02 M (10 mL)  $\text{CD}_3\text{CN}$ . Using 1,3,5-trimethoxybenzene as the internal standard, product formation and starting material consumption were monitored over time (Figure S7). The reaction was set up in two separate vials (one containing diol TsCl, and internal standard and the other containing solvent, catalyst and base). Immediately following mixing, the solution was transferred to an NMR tube. The presented graphs have been corrected for the time between mixing and the first spectrum acquisition.

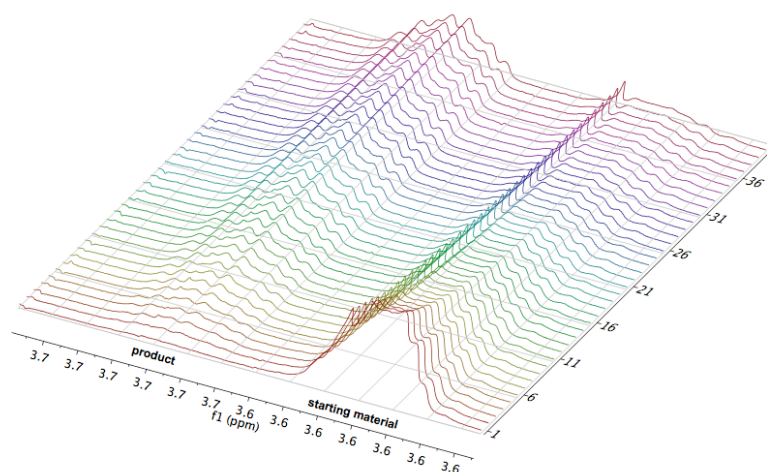

**Figure S7.** Overlay of  $^1\text{H}$  NMR spectra obtained during reaction monitoring for the tosylation of 1-phenyl-1,2-ethanediol. Integrated data is plotted in Fig. 7.

#### IV. Details of Computational Studies

Calculations were carried out with the Gaussian '09 software package,<sup>10</sup> on a Linux workstation equipped with two quad-core AMD Shanghai processors built by HardData, Inc. Edmonton, Alberta, Canada).

Geometry optimizations of the complexes were performed using density functional theory (B3LYP functional), with the 6-31+G(d,p) basis set for all atoms. Frequency calculations at the same level of theory demonstrated that the optimum structures had no imaginary vibrational frequencies. The calculated energies (Hartrees), zero-point energy corrections, and geometries (Cartesian coordinates, Å) of all complexes are provided on the pages that follow.

##### *Optimized geometries of 2b and 2c dimers*

Geometry optimizations were performed using the above specifications.

**Table S2.** Computed bond distances (Å).

|                        | <b>2b</b> | <b>2c</b> |
|------------------------|-----------|-----------|
| <i>B-C<sub>1</sub></i> | 1.54669   | 1.54276   |
| <i>B-C<sub>2</sub></i> | 1.54674   | 1.54084   |
| <i>B-O</i>             | 1.35367   | 1.36009   |

<sup>10</sup> Gaussian 09, Revision B.01, Frisch, M. J.; Trucks, G. W.; Schlegel, H. B.; Scuseria, G. E.; Robb, M. A.; Cheeseman, J. R.; Scalmani, G.; Barone, V.; Mennucci, B.; Petersson, G. A.; Nakatsuji, H.; Caricato, M.; Li, X.; Hratchian, H. P.; Izmaylov, A. F.; Bloino, J.; Zheng, G.; Sonnenberg, J. L.; Hada, M.; Ehara, M.; Toyota, K.; Fukuda, R.; Hasegawa, J.; Ishida, M.; Nakajima, T.; Honda, Y.; Kitao, O.; Nakai, H.; Vreven, T.; Montgomery, Jr., J. A.; Peralta, J. E.; Ogliaro, F.; Bearpark, M.; Heyd, J. J.; Brothers, E.; Kudin, K. N.; Staroverov, V. N.; Kobayashi, R.; Normand, J.; Raghavachari, K.; Rendell, A.; Burant, J. C.; Iyengar, S. S.; Tomasi, J.; Cossi, M.; Rega, N.; Millam, N. J.; Klene, M.; Knox, J. E.; Cross, J. B.; Bakken, V.; Adamo, C.; Jaramillo, J.; Gomperts, R.; Stratmann, R. E.; Yazyev, O.; Austin, A. J.; Cammi, R.; Pomelli, C.; Ochterski, J. W.; Martin, R. L.; Morokuma, K.; Zakrzewski, V. G.; Voth, G. A.; Salvador, P.; Dannenberg, J. J.; Dapprich, S.; Daniels, A. D.; Farkas, Ö.; Foresman, J. B.; Ortiz, J. V.; Cioslowski, J.; Fox, D. J. Gaussian, Inc., Wallingford CT, 2009.

**2b:**

Imaginary frequencies: none

$E = -1199.8023381$

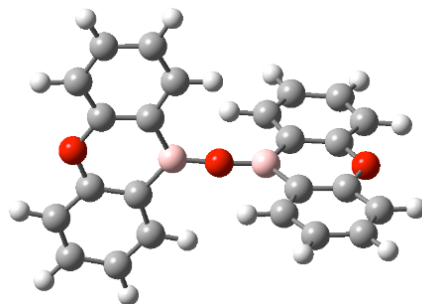

| Center Number | Atomic Number | Atomic Type | Coordinates (Angstroms) |           |           |
|---------------|---------------|-------------|-------------------------|-----------|-----------|
|               |               |             | X                       | Y         | Z         |
| 1             | 6             | 0           | -2.572346               | -2.556632 | -2.706423 |
| 2             | 6             | 0           | -1.726871               | -1.811940 | -1.894631 |
| 3             | 6             | 0           | -2.226278               | -0.908327 | -0.930112 |
| 4             | 6             | 0           | -3.625427               | -0.793031 | -0.825136 |
| 5             | 6             | 0           | -4.496827               | -1.536067 | -1.634947 |
| 6             | 6             | 0           | -3.964417               | -2.413473 | -2.571009 |
| 7             | 6             | 0           | -3.538344               | 0.846020  | 0.933027  |
| 8             | 6             | 0           | -2.131387               | 0.872973  | 0.981769  |
| 9             | 6             | 0           | -1.538413               | 1.743047  | 1.923919  |
| 10            | 1             | 0           | -0.453939               | 1.781814  | 1.982265  |
| 11            | 6             | 0           | -2.302282               | 2.539593  | 2.766785  |
| 12            | 6             | 0           | -3.704810               | 2.484656  | 2.687037  |
| 13            | 6             | 0           | -4.328214               | 1.642475  | 1.775186  |
| 14            | 1             | 0           | -2.164907               | -3.244824 | -3.440708 |
| 15            | 1             | 0           | -0.649930               | -1.917885 | -1.994148 |
| 16            | 1             | 0           | -5.568073               | -1.411404 | -1.515362 |
| 17            | 1             | 0           | -4.633707               | -2.991911 | -3.201503 |
| 18            | 1             | 0           | -1.823287               | 3.200583  | 3.482620  |
| 19            | 1             | 0           | -4.310635               | 3.104138  | 3.342234  |
| 20            | 1             | 0           | -5.409072               | 1.585465  | 1.698519  |
| 21            | 5             | 0           | -1.352945               | -0.043568 | 0.008859  |
| 22            | 8             | 0           | -0.000475               | -0.092034 | -0.019226 |
| 23            | 6             | 0           | 2.212038                | -0.982992 | 0.855408  |
| 24            | 6             | 0           | 2.145216                | 0.932406  | -0.923232 |
| 25            | 6             | 0           | 1.698711                | -1.955924 | 1.742060  |
| 26            | 6             | 0           | 3.612708                | -0.865510 | 0.775577  |
| 27            | 6             | 0           | 3.551399                | 0.896124  | -0.860824 |
| 28            | 6             | 0           | 1.565969                | 1.869524  | -1.807853 |
| 29            | 6             | 0           | 2.532354                | -2.763702 | 2.504260  |
| 30            | 1             | 0           | 0.620420                | -2.066053 | 1.820138  |
| 31            | 6             | 0           | 4.472273                | -1.670789 | 1.537121  |
| 32            | 6             | 0           | 4.353526                | 1.746430  | -1.636090 |
| 33            | 1             | 0           | 0.482342                | 1.916979  | -1.874774 |
| 34            | 6             | 0           | 2.342106                | 2.719977  | -2.584224 |
| 35            | 6             | 0           | 3.926313                | -2.615365 | 2.396891  |
| 36            | 1             | 0           | 2.114243                | -3.504813 | 3.178589  |
| 37            | 1             | 0           | 5.545215                | -1.541451 | 1.439780  |
| 38            | 6             | 0           | 3.743457                | 2.653362  | -2.493229 |
| 39            | 1             | 0           | 5.433250                | 1.679451  | -1.551804 |
| 40            | 1             | 0           | 1.873553                | 3.431574  | -3.257166 |
| 41            | 1             | 0           | 4.586429                | -3.242666 | 2.989174  |
| 42            | 1             | 0           | 4.358875                | 3.314581  | -3.096639 |
| 43            | 5             | 0           | 1.352445                | -0.047815 | -0.027087 |

|    |   |   |           |          |           |
|----|---|---|-----------|----------|-----------|
| 44 | 8 | 0 | 4.241989  | 0.035699 | -0.045403 |
| 45 | 8 | 0 | -4.241639 | 0.047127 | 0.067372  |

---

**2c:**

Imaginary frequencies: none

$E = -1238.6970067$

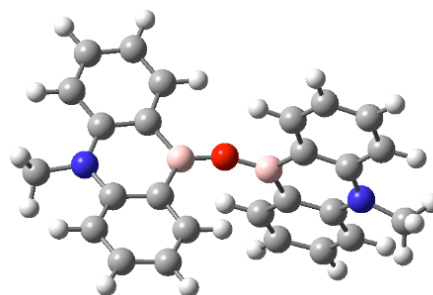

---

| Center<br>Number | Atomic<br>Number | Forces (Hartrees/Bohr) |              |              |
|------------------|------------------|------------------------|--------------|--------------|
|                  |                  | X                      | Y            | Z            |
| 1                | 6                | 0.000002840            | 0.000004016  | -0.000001196 |
| 2                | 6                | -0.000010134           | 0.000006081  | 0.000004875  |
| 3                | 6                | 0.000000300            | -0.000027705 | 0.000000736  |
| 4                | 6                | -0.000012734           | 0.000027905  | -0.000009499 |
| 5                | 6                | 0.000002143            | -0.000010295 | 0.000001146  |
| 6                | 6                | 0.000000550            | 0.000006012  | 0.000008034  |
| 7                | 6                | -0.000026376           | 0.000007927  | -0.000025777 |
| 8                | 6                | -0.000016928           | -0.000017313 | 0.000003889  |
| 9                | 6                | 0.000009107            | -0.000001266 | 0.000009883  |
| 10               | 1                | -0.000001904           | 0.000001882  | -0.000001485 |
| 11               | 6                | 0.000005987            | 0.000004818  | -0.000004401 |
| 12               | 6                | 0.000000927            | 0.000004385  | 0.000004954  |
| 13               | 6                | -0.000002047           | -0.000000611 | 0.000001854  |
| 14               | 1                | -0.000000138           | -0.000002041 | 0.000003402  |
| 15               | 1                | 0.000000878            | -0.000001066 | 0.000002643  |
| 16               | 1                | -0.000005196           | 0.000012736  | 0.000002029  |
| 17               | 1                | 0.000000121            | -0.000001164 | 0.000002609  |
| 18               | 1                | -0.000001354           | -0.000001538 | -0.000001730 |
| 19               | 1                | -0.000001314           | -0.000002259 | -0.000000556 |
| 20               | 1                | 0.000002873            | 0.000001008  | 0.000006961  |
| 21               | 5                | 0.000021348            | 0.000012269  | -0.000042957 |
| 22               | 8                | 0.000014060            | 0.000016810  | 0.000093518  |
| 23               | 6                | 0.000017868            | 0.000023316  | -0.000013865 |
| 24               | 6                | 0.000002506            | 0.000026427  | 0.000015191  |
| 25               | 6                | -0.000009460           | -0.000007745 | 0.000005279  |
| 26               | 6                | -0.000001272           | 0.000019518  | 0.000024274  |
| 27               | 6                | 0.000005635            | 0.000014312  | -0.000024100 |
| 28               | 6                | -0.000003735           | -0.000002697 | -0.000010010 |
| 29               | 6                | 0.000002596            | 0.000002107  | 0.000000890  |
| 30               | 1                | -0.000005201           | -0.000008436 | 0.000004051  |
| 31               | 6                | -0.000004806           | -0.000015864 | 0.000004928  |
| 32               | 6                | -0.000003301           | -0.000013994 | -0.000008699 |
| 33               | 1                | -0.000002494           | -0.000006905 | -0.000003122 |
| 34               | 6                | 0.000006043            | 0.000005708  | -0.000004722 |
| 35               | 6                | -0.000004675           | -0.000012336 | 0.000004944  |
| 36               | 1                | -0.000005607           | -0.000001474 | -0.000007503 |
| 37               | 1                | 0.000004306            | 0.000009819  | -0.000012974 |
| 38               | 6                | -0.000004869           | -0.000008094 | -0.000006738 |
| 39               | 1                | 0.000004092            | 0.000010560  | 0.000008269  |



|    |   |              |              |              |
|----|---|--------------|--------------|--------------|
| 40 | 1 | -0.000000703 | 0.000001842  | 0.000005770  |
| 41 | 1 | 0.000002150  | 0.000005826  | -0.000008040 |
| 42 | 1 | 0.000006978  | 0.000009039  | 0.000003145  |
| 43 | 5 | -0.000029920 | -0.000047095 | -0.000048117 |
| 44 | 7 | 0.000031887  | -0.000023576 | 0.000027632  |
| 45 | 7 | 0.000014609  | -0.000013285 | -0.000008405 |
| 46 | 6 | -0.000020546 | 0.000012143  | -0.000006118 |
| 47 | 1 | -0.000000285 | -0.000003102 | 0.000005659  |
| 48 | 1 | 0.000001495  | -0.000020217 | -0.000002460 |
| 49 | 1 | 0.000002592  | -0.000002350 | -0.000013454 |
| 50 | 6 | 0.000010630  | -0.000001966 | -0.000006662 |
| 51 | 1 | -0.000014553 | 0.000003928  | 0.000009165  |
| 52 | 1 | 0.000001633  | 0.000008330  | -0.000008454 |
| 53 | 1 | 0.000013396  | -0.000004333 | 0.000015313  |

### Tetracoordinate boron stabilities (Fig. 3)

The relative stabilities of tetracoordinate boron adducts of **1b**, **2a-c** were assessed using the reaction shown in equation 10. Computed complexes corresponding to the methyl esters of the catalysts are reported as **1b'**, **2a'**, **2b'** and **2c'** respectively. The binding energies,  $\Delta E$ , were estimated by equation 11.

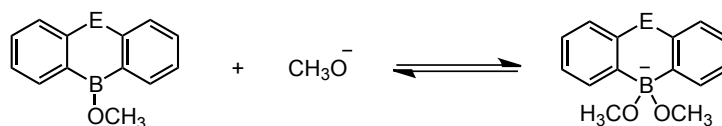

$$\Delta E = E_{\text{complex}} - (E_{\text{donor}} + E_{\text{acceptor}}) \quad (11)$$

where  $E_{\text{complex}}$ ,  $E_{\text{donor}}$  and  $E_{\text{acceptor}}$  are the calculated energies of the complex, donor and acceptor, respectively.

#### Methoxide ( $\text{CH}_3\text{O}^-$ ):

Imaginary frequencies: none

$E = -115.1155202$

ZPE = 0.0349809

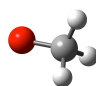

| Center Number | Atomic Number | Atomic Type | Coordinates (Angstroms) |           |           |
|---------------|---------------|-------------|-------------------------|-----------|-----------|
|               |               |             | X                       | Y         | Z         |
| 1             | 8             | 0           | -0.797183               | -0.000150 | -0.000094 |
| 2             | 6             | 0           | 0.543690                | 0.000002  | -0.000103 |
| 3             | 1             | 0           | 1.037197                | 1.016590  | -0.156074 |
| 4             | 1             | 0           | 1.037945                | -0.372126 | 0.958668  |
| 5             | 1             | 0           | 1.040186                | -0.643272 | -0.801229 |

**1b'**:

Imaginary frequencies: none

$E = -603.3894322$

ZPE = 0.2289224

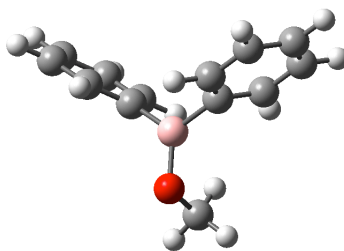

| Center Number | Atomic Number | Atomic Type | Coordinates (Angstroms) |           |           |
|---------------|---------------|-------------|-------------------------|-----------|-----------|
|               |               |             | X                       | Y         | Z         |
| 1             | 6             | 0           | -2.319291               | 0.320712  | -0.916179 |
| 2             | 6             | 0           | -1.303621               | 0.054839  | 0.024305  |
| 3             | 6             | 0           | -1.546645               | -0.964183 | 0.966851  |
| 4             | 6             | 0           | -2.751840               | -1.671820 | 0.983446  |
| 5             | 6             | 0           | -3.738857               | -1.394083 | 0.034108  |
| 6             | 6             | 0           | -3.516840               | -0.398732 | -0.922136 |
| 7             | 1             | 0           | -2.169107               | 1.093433  | -1.666890 |
| 8             | 1             | 0           | -0.783677               | -1.205029 | 1.703042  |
| 9             | 1             | 0           | -2.916312               | -2.444102 | 1.729985  |
| 10            | 1             | 0           | -4.672412               | -1.949859 | 0.037348  |
| 11            | 1             | 0           | -4.276685               | -0.180910 | -1.667799 |
| 12            | 5             | 0           | 0.062640                | 0.850193  | 0.023160  |
| 13            | 6             | 0           | 1.459604                | 0.132201  | -0.036606 |
| 14            | 6             | 0           | 1.584855                | -1.233201 | -0.361828 |
| 15            | 6             | 0           | 2.646031                | 0.851352  | 0.220730  |
| 16            | 6             | 0           | 2.834389                | -1.855369 | -0.427013 |
| 17            | 1             | 0           | 0.693013                | -1.815372 | -0.576181 |
| 18            | 6             | 0           | 3.896591                | 0.235989  | 0.165617  |
| 19            | 1             | 0           | 2.574933                | 1.906867  | 0.466461  |
| 20            | 6             | 0           | 3.993120                | -1.121766 | -0.159610 |
| 21            | 1             | 0           | 2.904144                | -2.908367 | -0.686091 |
| 22            | 1             | 0           | 4.795644                | 0.810149  | 0.373142  |
| 23            | 1             | 0           | 4.966219                | -1.603401 | -0.206114 |
| 24            | 8             | 0           | 0.113509                | 2.214191  | 0.076268  |
| 25            | 6             | 0           | -0.992982               | 3.096145  | 0.245532  |
| 26            | 1             | 0           | -0.672440               | 3.906105  | 0.906524  |
| 27            | 1             | 0           | -1.272625               | 3.524599  | -0.722755 |
| 28            | 1             | 0           | -1.859049               | 2.588885  | 0.680070  |

**2a'**:

Imaginary frequencies: none

$E = -1000.3783212$

ZPE = 0.2091963

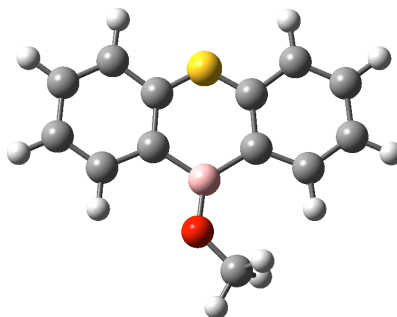

| Center Number | Atomic Number | Atomic Type | Coordinates (Angstroms) |   |   |
|---------------|---------------|-------------|-------------------------|---|---|
|               |               |             | X                       | Y | Z |

|    |    |   |           |           |           |
|----|----|---|-----------|-----------|-----------|
| 1  | 6  | 0 | -3.825701 | 0.652526  | 0.000012  |
| 2  | 6  | 0 | -2.561882 | 1.228188  | -0.000005 |
| 3  | 6  | 0 | -1.376638 | 0.454413  | -0.000014 |
| 4  | 6  | 0 | -1.534509 | -0.946429 | -0.000003 |
| 5  | 6  | 0 | -2.810792 | -1.542590 | 0.000013  |
| 6  | 6  | 0 | -3.947634 | -0.745290 | 0.000020  |
| 7  | 6  | 0 | 1.289904  | -1.106116 | -0.000008 |
| 8  | 6  | 0 | 1.337795  | 0.313558  | -0.000021 |
| 9  | 6  | 0 | 2.636756  | 0.884955  | -0.000005 |
| 10 | 1  | 0 | 2.741467  | 1.960744  | -0.000007 |
| 11 | 6  | 0 | 3.800854  | 0.126986  | 0.000012  |
| 12 | 6  | 0 | 3.712968  | -1.270907 | 0.000017  |
| 13 | 6  | 0 | 2.467426  | -1.880994 | 0.000007  |
| 14 | 1  | 0 | -4.713579 | 1.278027  | 0.000018  |
| 15 | 1  | 0 | -2.459401 | 2.308462  | -0.000015 |
| 16 | 1  | 0 | -2.904462 | -2.625265 | 0.000020  |
| 17 | 1  | 0 | -4.929378 | -1.210598 | 0.000033  |
| 18 | 1  | 0 | 4.770056  | 0.616590  | 0.000022  |
| 19 | 1  | 0 | 4.612022  | -1.880548 | 0.000031  |
| 20 | 1  | 0 | 2.395654  | -2.965389 | 0.000016  |
| 21 | 5  | 0 | 0.019447  | 1.159802  | -0.000045 |
| 22 | 8  | 0 | -0.079957 | 2.528624  | -0.000010 |
| 23 | 6  | 0 | 0.898852  | 3.551967  | 0.000014  |
| 24 | 1  | 0 | 1.529412  | 3.506286  | -0.895285 |
| 25 | 1  | 0 | 0.365301  | 4.506292  | 0.000023  |
| 26 | 1  | 0 | 1.529396  | 3.506261  | 0.895323  |
| 27 | 16 | 0 | -0.182404 | -2.084403 | -0.000008 |

**2b'**:

Imaginary frequencies: none

$E = -677.4180169$

ZPE = 0.21246

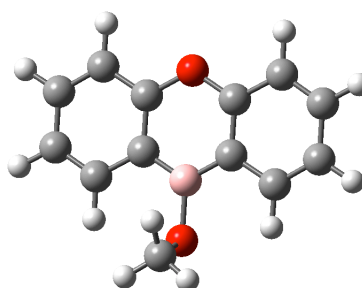

| Center Number | Atomic Number | Atomic Type | Coordinates (Angstroms) |           |           |
|---------------|---------------|-------------|-------------------------|-----------|-----------|
|               |               |             | X                       | Y         | Z         |
| 1             | 6             | 0           | -3.787678               | 0.332766  | -0.000001 |
| 2             | 6             | 0           | -2.597754               | 1.049470  | -0.000015 |
| 3             | 6             | 0           | -1.341235               | 0.403002  | -0.000029 |
| 4             | 6             | 0           | -1.349617               | -1.000302 | -0.000022 |
| 5             | 6             | 0           | -2.536818               | -1.746440 | 0.000011  |
| 6             | 6             | 0           | -3.751678               | -1.072758 | 0.000023  |
| 7             | 6             | 0           | 1.048582                | -1.171569 | 0.000004  |
| 8             | 6             | 0           | 1.276173                | 0.225181  | -0.000052 |
| 9             | 6             | 0           | 2.636696                | 0.625666  | -0.000038 |
| 10            | 1             | 0           | 2.877698                | 1.681304  | -0.000076 |
| 11            | 6             | 0           | 3.685425                | -0.284934 | -0.000011 |
| 12            | 6             | 0           | 3.409364                | -1.661316 | 0.000024  |
| 13            | 6             | 0           | 2.095828                | -2.106139 | 0.000035  |
| 14            | 1             | 0           | -4.741745               | 0.851417  | -0.000003 |

|    |   |   |           |           |           |
|----|---|---|-----------|-----------|-----------|
| 15 | 1 | 0 | -2.613171 | 2.135321  | -0.000016 |
| 16 | 1 | 0 | -2.484565 | -2.830278 | 0.000027  |
| 17 | 1 | 0 | -4.677825 | -1.640610 | 0.000051  |
| 18 | 1 | 0 | 4.712832  | 0.066189  | -0.000004 |
| 19 | 1 | 0 | 4.221604  | -2.382522 | 0.000062  |
| 20 | 1 | 0 | 1.851891  | -3.163398 | 0.000071  |
| 21 | 8 | 0 | -0.195790 | -1.742571 | -0.000014 |
| 22 | 5 | 0 | 0.019589  | 1.146244  | -0.000040 |
| 23 | 8 | 0 | -0.047728 | 2.513702  | 0.000033  |
| 24 | 6 | 0 | 1.019623  | 3.448750  | 0.000041  |
| 25 | 1 | 0 | 1.643510  | 3.343503  | -0.894979 |
| 26 | 1 | 0 | 0.574976  | 4.447137  | 0.000073  |
| 27 | 1 | 0 | 1.643535  | 3.343410  | 0.895027  |

**2c'**:

Imaginary frequencies: none

$E = -696.8642857$

ZPE = 0.253723

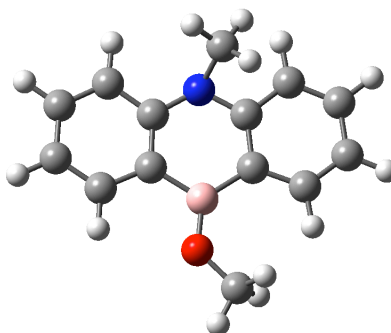

| Center Number | Atomic Number | Atomic Type | Coordinates (Angstroms) |           |           |
|---------------|---------------|-------------|-------------------------|-----------|-----------|
|               |               |             | X                       | Y         | Z         |
| 1             | 6             | 0           | 3.734204                | 0.751162  | -0.298520 |
| 2             | 6             | 0           | 2.495705                | 1.369417  | -0.185987 |
| 3             | 6             | 0           | 1.301509                | 0.636863  | -0.028151 |
| 4             | 6             | 0           | 1.379689                | -0.777643 | 0.032968  |
| 5             | 6             | 0           | 2.639945                | -1.408340 | -0.098876 |
| 6             | 6             | 0           | 3.792738                | -0.648776 | -0.261785 |
| 7             | 6             | 0           | -1.067795               | -1.024533 | 0.039217  |
| 8             | 6             | 0           | -1.303266               | 0.384614  | -0.027736 |
| 9             | 6             | 0           | -2.636399               | 0.810999  | -0.228496 |
| 10            | 1             | 0           | -2.840020               | 1.871725  | -0.304582 |
| 11            | 6             | 0           | -3.703594               | -0.069020 | -0.351535 |
| 12            | 6             | 0           | -3.450946               | -1.443929 | -0.283701 |
| 13            | 6             | 0           | -2.159624               | -1.917246 | -0.095975 |
| 14            | 1             | 0           | 4.639979                | 1.337160  | -0.421988 |
| 15            | 1             | 0           | 2.421306                | 2.452405  | -0.218706 |
| 16            | 1             | 0           | 2.727905                | -2.487473 | -0.110079 |
| 17            | 1             | 0           | 4.746478                | -1.157955 | -0.372154 |
| 18            | 1             | 0           | -4.711677               | 0.302096  | -0.508407 |
| 19            | 1             | 0           | -4.263402               | -2.156724 | -0.396094 |
| 20            | 1             | 0           | -2.002269               | -2.988024 | -0.096311 |
| 21            | 5             | 0           | -0.076720               | 1.329440  | 0.068083  |
| 22            | 8             | 0           | -0.050153               | 2.696611  | 0.205475  |
| 23            | 6             | 0           | -1.131689               | 3.590005  | 0.406341  |
| 24            | 1             | 0           | -1.816156               | 3.231964  | 1.183883  |
| 25            | 1             | 0           | -0.708113               | 4.546679  | 0.724537  |
| 26            | 1             | 0           | -1.691148               | 3.752106  | -0.523091 |
| 27            | 7             | 0           | 0.219719                | -1.544944 | 0.222517  |

|    |   |   |           |           |           |
|----|---|---|-----------|-----------|-----------|
| 28 | 6 | 0 | 0.364815  | -2.948699 | 0.604230  |
| 29 | 1 | 0 | -0.473406 | -3.244882 | 1.235326  |
| 30 | 1 | 0 | 0.413285  | -3.623117 | -0.261401 |
| 31 | 1 | 0 | 1.272289  | -3.070684 | 1.195265  |

**1b'---CH<sub>3</sub>O<sup>-</sup>:**

Imaginary frequencies: none

$E = -718.6008297$

ZPE = 0.2679565

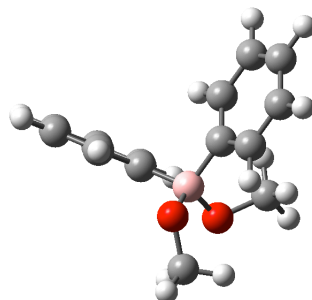

| Center Number | Atomic Number | Atomic Type | Coordinates (Angstroms) |           |           |
|---------------|---------------|-------------|-------------------------|-----------|-----------|
|               |               |             | X                       | Y         | Z         |
| 1             | 6             | 0           | 1.350963                | -0.094205 | -0.025607 |
| 2             | 6             | 0           | 2.223128                | -0.150534 | -1.128927 |
| 3             | 6             | 0           | 1.687530                | -0.904483 | 1.077028  |
| 4             | 6             | 0           | 3.361711                | -0.966991 | -1.138775 |
| 5             | 1             | 0           | 1.995133                | 0.471286  | -1.991157 |
| 6             | 6             | 0           | 2.821874                | -1.722683 | 1.086076  |
| 7             | 1             | 0           | 1.038812                | -0.888411 | 1.951486  |
| 8             | 6             | 0           | 3.668782                | -1.760271 | -0.028448 |
| 9             | 1             | 0           | 4.011981                | -0.983571 | -2.012964 |
| 10            | 1             | 0           | 3.046599                | -2.333848 | 1.959390  |
| 11            | 1             | 0           | 4.551743                | -2.396932 | -0.030065 |
| 12            | 6             | 0           | -1.351201               | -0.093749 | 0.025419  |
| 13            | 6             | 0           | -1.688782               | -0.902090 | -1.078345 |
| 14            | 6             | 0           | -2.222431               | -0.151924 | 1.129375  |
| 15            | 6             | 0           | -2.823167               | -1.720214 | -1.087822 |
| 16            | 1             | 0           | -1.040821               | -0.884485 | -1.953333 |
| 17            | 6             | 0           | -3.361050               | -0.968345 | 1.138796  |
| 18            | 1             | 0           | -1.993698               | 0.468423  | 1.992473  |
| 19            | 6             | 0           | -3.669104               | -1.759709 | 0.027379  |
| 20            | 1             | 0           | -3.048698               | -2.329847 | -1.961999 |
| 21            | 1             | 0           | -4.010570               | -0.986389 | 2.013512  |
| 22            | 1             | 0           | -4.552080               | -2.396349 | 0.028664  |
| 23            | 8             | 0           | -0.055883               | 1.684907  | 1.236164  |
| 24            | 8             | 0           | 0.056245                | 1.685743  | -1.235142 |
| 25            | 6             | 0           | 0.990122                | 2.590228  | 1.452556  |
| 26            | 1             | 0           | 1.107141                | 3.305404  | 0.620101  |
| 27            | 1             | 0           | 0.777745                | 3.163592  | 2.367999  |
| 28            | 1             | 0           | 1.963499                | 2.085941  | 1.585622  |
| 29            | 6             | 0           | -0.989162               | 2.591967  | -1.450651 |
| 30            | 1             | 0           | -1.963000               | 2.088493  | -1.583426 |
| 31            | 1             | 0           | -1.105190               | 3.306888  | -0.617845 |
| 32            | 1             | 0           | -0.776794               | 3.165517  | -2.365979 |
| 33            | 5             | 0           | 0.000004                | 0.851422  | 0.000203  |

**2a'**---CH<sub>3</sub>O<sup>-</sup>:

Imaginary frequencies: none

$E = -1115.5873391$

ZPE = 0.2483841

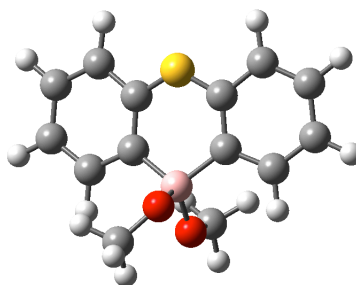

| Center Number | Atomic Number | Atomic Type | Coordinates (Angstroms) |           |           |
|---------------|---------------|-------------|-------------------------|-----------|-----------|
|               |               |             | X                       | Y         | Z         |
| 1             | 6             | 0           | -3.836878               | 0.396803  | -0.374449 |
| 2             | 6             | 0           | -2.585165               | 1.001816  | -0.240814 |
| 3             | 6             | 0           | -1.405265               | 0.276808  | 0.014470  |
| 4             | 6             | 0           | -1.550193               | -1.118002 | 0.114623  |
| 5             | 6             | 0           | -2.797853               | -1.753023 | -0.028009 |
| 6             | 6             | 0           | -3.943444               | -0.995151 | -0.265955 |
| 7             | 6             | 0           | 1.287163                | -1.289369 | 0.038505  |
| 8             | 6             | 0           | 1.306188                | 0.114360  | -0.078910 |
| 9             | 6             | 0           | 2.549975                | 0.677810  | -0.429873 |
| 10            | 1             | 0           | 2.595290                | 1.758923  | -0.544559 |
| 11            | 6             | 0           | 3.708799                | -0.079491 | -0.622093 |
| 12            | 6             | 0           | 3.651022                | -1.470906 | -0.485087 |
| 13            | 6             | 0           | 2.435976                | -2.075377 | -0.165145 |
| 14            | 1             | 0           | -4.723395               | 1.000832  | -0.559091 |
| 15            | 1             | 0           | -2.497803               | 2.083643  | -0.316619 |
| 16            | 1             | 0           | -2.865924               | -2.836937 | 0.041291  |
| 17            | 1             | 0           | -4.906992               | -1.488924 | -0.374945 |
| 18            | 1             | 0           | 4.647873                | 0.407650  | -0.878303 |
| 19            | 1             | 0           | 4.537528                | -2.082667 | -0.639335 |
| 20            | 1             | 0           | 2.372218                | -3.158701 | -0.082796 |
| 21            | 5             | 0           | 0.005414                | 1.082586  | 0.241608  |
| 22            | 8             | 0           | 0.067873                | 2.325394  | -0.586132 |
| 23            | 8             | 0           | -0.010584               | 1.496227  | 1.662295  |
| 24            | 6             | 0           | 0.032492                | 2.232421  | -1.981071 |
| 25            | 1             | 0           | 0.102986                | 3.246049  | -2.404655 |
| 26            | 1             | 0           | 0.866057                | 1.636682  | -2.393429 |
| 27            | 1             | 0           | -0.902453               | 1.777048  | -2.353319 |
| 28            | 6             | 0           | 1.023777                | 2.308577  | 2.145385  |
| 29            | 1             | 0           | 2.003665                | 1.797712  | 2.137818  |
| 30            | 1             | 0           | 1.127007                | 3.240246  | 1.565445  |
| 31            | 1             | 0           | 0.796575                | 2.576172  | 3.188087  |
| 32            | 16            | 0           | -0.181099               | -2.206706 | 0.496725  |

**2b'---CH<sub>3</sub>O<sup>-</sup>:**

Imaginary frequencies: none

$E = -792.6222168$

ZPE = 0.2512311

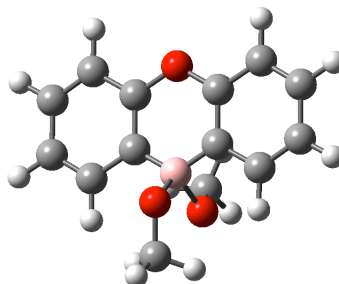

| Center Number | Atomic Number | Atomic Type | Coordinates (Angstroms) |           |           |
|---------------|---------------|-------------|-------------------------|-----------|-----------|
|               |               |             | X                       | Y         | Z         |
| 1             | 6             | 0           | 3.820628                | 0.069102  | 0.103592  |
| 2             | 6             | 0           | 2.631145                | 0.802987  | 0.092521  |
| 3             | 6             | 0           | 1.366701                | 0.204284  | -0.047851 |
| 4             | 6             | 0           | 1.361046                | -1.191459 | -0.169027 |
| 5             | 6             | 0           | 2.535301                | -1.960234 | -0.166466 |
| 6             | 6             | 0           | 3.768879                | -1.325173 | -0.031290 |
| 7             | 6             | 0           | -1.049396               | -1.369251 | -0.123598 |
| 8             | 6             | 0           | -1.257070               | 0.012207  | 0.022134  |
| 9             | 6             | 0           | -2.590259               | 0.400269  | 0.257306  |
| 10            | 1             | 0           | -2.789492               | 1.458853  | 0.413041  |
| 11            | 6             | 0           | -3.654281               | -0.506249 | 0.305931  |
| 12            | 6             | 0           | -3.401011               | -1.871769 | 0.125317  |
| 13            | 6             | 0           | -2.092817               | -2.306643 | -0.082980 |
| 14            | 1             | 0           | 4.779366                | 0.573144  | 0.209805  |
| 15            | 1             | 0           | 2.665319                | 1.886679  | 0.186586  |
| 16            | 1             | 0           | 2.461259                | -3.039929 | -0.267922 |
| 17            | 1             | 0           | 4.683029                | -1.915457 | -0.027845 |
| 18            | 1             | 0           | -4.669279               | -0.155643 | 0.482751  |
| 19            | 1             | 0           | -4.213168               | -2.595143 | 0.157579  |
| 20            | 1             | 0           | -1.859088               | -3.361057 | -0.206065 |
| 21            | 8             | 0           | 0.200268                | -1.932458 | -0.312160 |
| 22            | 5             | 0           | -0.010716               | 1.076041  | -0.129983 |
| 23            | 8             | 0           | -0.082551               | 2.156114  | 0.896467  |
| 24            | 8             | 0           | 0.005263                | 1.732594  | -1.457778 |
| 25            | 6             | 0           | -0.061378               | 1.810381  | 2.250198  |
| 26            | 1             | 0           | -0.138431               | 2.728836  | 2.852184  |
| 27            | 1             | 0           | -0.899177               | 1.149043  | 2.535590  |
| 28            | 1             | 0           | 0.872148                | 1.295444  | 2.541765  |
| 29            | 6             | 0           | -1.025830               | 2.619299  | -1.791554 |
| 30            | 1             | 0           | -1.997232               | 2.108526  | -1.925677 |
| 31            | 1             | 0           | -1.161640               | 3.406571  | -1.032233 |
| 32            | 1             | 0           | -0.773816               | 3.103428  | -2.747274 |

**2c'**---CH<sub>3</sub>O<sup>-</sup>:

Imaginary frequencies: none

$E = -812.0620120$

ZPE = 0.2921256

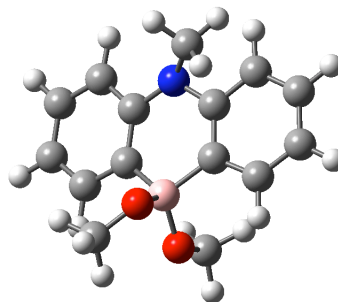

| Center Number | Atomic Number | Atomic Type | Coordinates (Angstroms) |           |           |
|---------------|---------------|-------------|-------------------------|-----------|-----------|
|               |               |             | X                       | Y         | Z         |
| 1             | 6             | 0           | 3.770659                | -0.470993 | -0.382295 |
| 2             | 6             | 0           | 2.539604                | -1.118376 | -0.218754 |
| 3             | 6             | 0           | 1.341246                | -0.432643 | 0.012877  |
| 4             | 6             | 0           | 1.401698                | 0.980250  | 0.074259  |
| 5             | 6             | 0           | 2.632879                | 1.648714  | -0.109051 |
| 6             | 6             | 0           | 3.807607                | 0.923534  | -0.328742 |
| 7             | 6             | 0           | -1.056524               | 1.227901  | -0.006651 |
| 8             | 6             | 0           | -1.272026               | -0.171847 | -0.093555 |
| 9             | 6             | 0           | -2.563451               | -0.596060 | -0.435069 |
| 10            | 1             | 0           | -2.734544               | -1.668384 | -0.514164 |
| 11            | 6             | 0           | -3.628127               | 0.285900  | -0.664331 |
| 12            | 6             | 0           | -3.392850               | 1.657931  | -0.572180 |
| 13            | 6             | 0           | -2.115269               | 2.129658  | -0.255688 |
| 14            | 1             | 0           | 4.682359                | -1.041874 | -0.547876 |
| 15            | 1             | 0           | 2.493316                | -2.205398 | -0.253072 |
| 16            | 1             | 0           | 2.686283                | 2.732690  | -0.107989 |
| 17            | 1             | 0           | 4.745111                | 1.458913  | -0.468209 |
| 18            | 1             | 0           | -4.618559               | -0.090505 | -0.913005 |
| 19            | 1             | 0           | -4.192588               | 2.372042  | -0.760145 |
| 20            | 1             | 0           | -1.951736               | 3.202250  | -0.235585 |
| 21            | 5             | 0           | -0.061772               | -1.220746 | 0.265036  |
| 22            | 8             | 0           | -0.172969               | -2.485131 | -0.524197 |
| 23            | 8             | 0           | -0.071906               | -1.597241 | 1.700711  |
| 24            | 6             | 0           | -0.133053               | -2.433965 | -1.920062 |
| 25            | 1             | 0           | -0.248004               | -3.455503 | -2.315150 |
| 26            | 1             | 0           | -0.939441               | -1.813912 | -2.350949 |
| 27            | 1             | 0           | 0.821397                | -2.031007 | -2.304157 |
| 28            | 6             | 0           | -1.155944               | -2.336416 | 2.190235  |
| 29            | 1             | 0           | -2.108558               | -1.777489 | 2.140473  |
| 30            | 1             | 0           | -1.295822               | -3.283453 | 1.643262  |
| 31            | 1             | 0           | -0.966290               | -2.575802 | 3.247838  |
| 32            | 7             | 0           | 0.225174                | 1.727453  | 0.321087  |
| 33            | 6             | 0           | 0.351112                | 3.108730  | 0.735603  |
| 34            | 1             | 0           | 0.442367                | 3.821571  | -0.103746 |
| 35            | 1             | 0           | -0.522938               | 3.393412  | 1.327407  |
| 36            | 1             | 0           | 1.233916                | 3.219069  | 1.370591  |



**Mulliken atomic charge (Fig. 6)**

Geometry optimizations of the ethylene glycol adduct of each borinic acid was performed and the Mulliken charges for the *B*-bound oxygens calculated, with the averages reported. Computed complexes corresponding to the ethylene glycol adducts are reported as **1b''**, **2a''**, **2b''** and **2c''** respectively (Table S3).

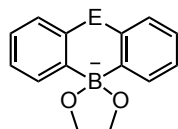

**Table S3.** Computed Mulliken charges

|             | <b>1b''</b> <sup>11</sup> | <b>2a''</b> | <b>2b''</b> | <b>2c''</b> |
|-------------|---------------------------|-------------|-------------|-------------|
| <i>O</i> -1 | -0.388                    | -0.440      | -0.492      | -0.479      |
| <i>O</i> -2 | -0.388                    | -0.601      | -0.537      | -0.577      |
| Avg.        | -0.388                    | -0.521      | -0.515      | -0.528      |

**2a'':**

$E = -1114.3876503$

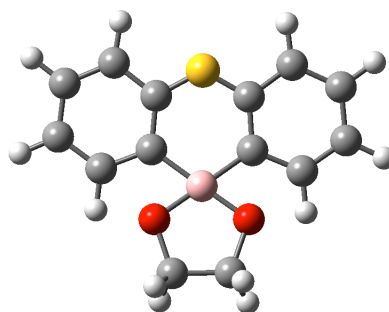

| Center Number | Atomic Number | Atomic Type | Coordinates (Angstroms) |           |           |
|---------------|---------------|-------------|-------------------------|-----------|-----------|
|               |               |             | X                       | Y         | Z         |
| 1             | 6             | 0           | -3.709945               | 0.058634  | -0.907111 |
| 2             | 6             | 0           | -2.498144               | 0.742860  | -0.778040 |
| 3             | 6             | 0           | -1.357694               | 0.163640  | -0.193697 |
| 4             | 6             | 0           | -1.479545               | -1.178774 | 0.212329  |
| 5             | 6             | 0           | -2.685342               | -1.889184 | 0.087282  |
| 6             | 6             | 0           | -3.806846               | -1.264871 | -0.460643 |
| 7             | 6             | 0           | 1.330554                | -1.294435 | 0.184246  |
| 8             | 6             | 0           | 1.310834                | 0.051545  | -0.232775 |
| 9             | 6             | 0           | 2.488376                | 0.528040  | -0.838237 |
| 10            | 1             | 0           | 2.482231                | 1.551911  | -1.204988 |
| 11            | 6             | 0           | 3.639547                | -0.254208 | -0.974196 |
| 12            | 6             | 0           | 3.634297                | -1.576785 | -0.516826 |
| 13            | 6             | 0           | 2.471558                | -2.102304 | 0.049634  |
| 14            | 1             | 0           | -4.573721               | 0.549248  | -1.352412 |
| 15            | 1             | 0           | -2.414343               | 1.768804  | -1.130167 |
| 16            | 1             | 0           | -2.737877               | -2.929577 | 0.401220  |

<sup>11</sup> Data obtained from: Lee, D.; Williamson, C. L.; Chan, L.; Taylor, M. S. *J. Am. Chem. Soc.*, 2012, **134**, 8260–8267.

|    |    |   |           |           |           |
|----|----|---|-----------|-----------|-----------|
| 17 | 1  | 0 | -4.740233 | -1.815786 | -0.557563 |
| 18 | 1  | 0 | 4.534247  | 0.160580  | -1.435467 |
| 19 | 1  | 0 | 4.517935  | -2.203386 | -0.620152 |
| 20 | 1  | 0 | 2.442070  | -3.141515 | 0.370648  |
| 21 | 16 | 0 | -0.101833 | -2.067395 | 0.942109  |
| 22 | 6  | 0 | 0.537013  | 2.861064  | 1.374032  |
| 23 | 6  | 0 | 0.062281  | 3.380798  | 0.007234  |
| 24 | 1  | 0 | 1.644289  | 2.868834  | 1.418986  |
| 25 | 1  | 0 | 0.160248  | 3.460334  | 2.217381  |
| 26 | 1  | 0 | -0.960698 | 3.796695  | 0.091315  |
| 27 | 1  | 0 | 0.713360  | 4.170709  | -0.401714 |
| 28 | 5  | 0 | 0.013578  | 1.018390  | 0.030663  |
| 29 | 8  | 0 | 0.083208  | 2.244816  | -0.826901 |
| 30 | 8  | 0 | 0.025826  | 1.554359  | 1.438960  |

**2b''**:

$E = -791.4204941$

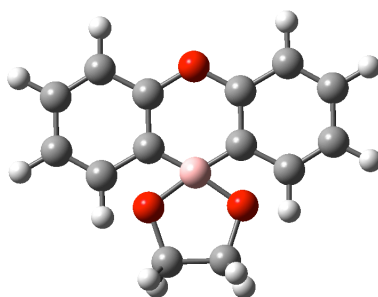

| Center Number | Atomic Number | Atomic Type | Coordinates (Angstroms) |           |           |
|---------------|---------------|-------------|-------------------------|-----------|-----------|
|               |               |             | X                       | Y         | Z         |
| 1             | 6             | 0           | -3.708275               | -0.468757 | -0.366589 |
| 2             | 6             | 0           | -2.604021               | 0.387759  | -0.373906 |
| 3             | 6             | 0           | -1.292217               | -0.049467 | -0.112496 |
| 4             | 6             | 0           | -1.148208               | -1.425629 | 0.121889  |
| 5             | 6             | 0           | -2.234189               | -2.314261 | 0.140302  |
| 6             | 6             | 0           | -3.519625               | -1.831500 | -0.098601 |
| 7             | 6             | 0           | 1.264272                | -1.352496 | 0.130140  |
| 8             | 6             | 0           | 1.327956                | 0.031847  | -0.083991 |
| 9             | 6             | 0           | 2.612599                | 0.554673  | -0.317547 |
| 10            | 1             | 0           | 2.699224                | 1.623790  | -0.500977 |
| 11            | 6             | 0           | 3.765758                | -0.233701 | -0.319569 |
| 12            | 6             | 0           | 3.657025                | -1.610865 | -0.079306 |
| 13            | 6             | 0           | 2.402303                | -2.174468 | 0.142883  |
| 14            | 1             | 0           | -4.705971               | -0.083741 | -0.568779 |
| 15            | 1             | 0           | -2.749805               | 1.442355  | -0.597489 |
| 16            | 1             | 0           | -2.050562               | -3.368270 | 0.332292  |
| 17            | 1             | 0           | -4.365454               | -2.515918 | -0.087514 |
| 18            | 1             | 0           | 4.740483                | 0.214784  | -0.501710 |
| 19            | 1             | 0           | 4.542815                | -2.242789 | -0.072537 |
| 20            | 1             | 0           | 2.282147                | -3.240066 | 0.320316  |
| 21            | 8             | 0           | 0.076796                | -2.027802 | 0.350759  |
| 22            | 6             | 0           | 0.026820                | 3.281538  | -0.454072 |
| 23            | 6             | 0           | -0.430987               | 3.041552  | 0.994666  |
| 24            | 1             | 0           | -0.597438               | 4.019924  | -0.983883 |
| 25            | 1             | 0           | 1.069805                | 3.655846  | -0.468028 |

|    |   |   |           |          |           |
|----|---|---|-----------|----------|-----------|
| 26 | 1 | 0 | 0.013580  | 3.753645 | 1.708089  |
| 27 | 1 | 0 | -1.532910 | 3.136945 | 1.067767  |
| 28 | 5 | 0 | -0.010091 | 0.955163 | -0.013942 |
| 29 | 8 | 0 | -0.004041 | 1.733909 | 1.279041  |
| 30 | 8 | 0 | -0.074097 | 2.020183 | -1.069882 |

**2c''**:

$E = -810.8614371$

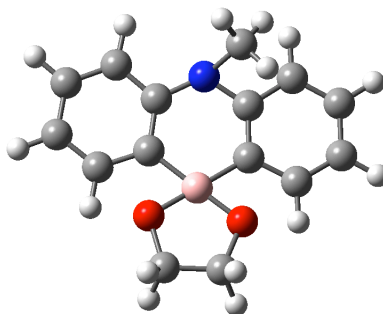

| Center Number | Atomic Number | Atomic Type | Coordinates (Angstroms) |           |           |
|---------------|---------------|-------------|-------------------------|-----------|-----------|
|               |               |             | X                       | Y         | Z         |
| 1             | 6             | 0           | -3.697771               | 0.236843  | -0.779342 |
| 2             | 6             | 0           | -2.487481               | 0.931569  | -0.659024 |
| 3             | 6             | 0           | -1.308549               | 0.329130  | -0.206855 |
| 4             | 6             | 0           | -1.356770               | -1.053187 | 0.099391  |
| 5             | 6             | 0           | -2.568112               | -1.767862 | -0.021924 |
| 6             | 6             | 0           | -3.731084               | -1.119731 | -0.449435 |
| 7             | 6             | 0           | 1.094671                | -1.275075 | 0.075186  |
| 8             | 6             | 0           | 1.285692                | 0.093241  | -0.247375 |
| 9             | 6             | 0           | 2.546066                | 0.469253  | -0.726754 |
| 10            | 1             | 0           | 2.684075                | 1.511401  | -1.007519 |
| 11            | 6             | 0           | 3.613087                | -0.430714 | -0.852526 |
| 12            | 6             | 0           | 3.410791                | -1.767668 | -0.506329 |
| 13            | 6             | 0           | 2.157071                | -2.194410 | -0.055973 |
| 14            | 1             | 0           | -4.598130               | 0.743310  | -1.122063 |
| 15            | 1             | 0           | -2.444481               | 1.988333  | -0.916078 |
| 16            | 1             | 0           | -2.612164               | -2.832692 | 0.183366  |
| 17            | 1             | 0           | -4.654765               | -1.688623 | -0.539516 |
| 18            | 1             | 0           | 4.582989                | -0.095648 | -1.215613 |
| 19            | 1             | 0           | 4.216836                | -2.492878 | -0.602981 |
| 20            | 1             | 0           | 2.014200                | -3.248739 | 0.158490  |
| 21            | 7             | 0           | -0.176799               | -1.716838 | 0.514178  |
| 22            | 6             | 0           | -0.290238               | -3.018068 | 1.136170  |
| 23            | 1             | 0           | -0.372606               | -3.853546 | 0.417140  |
| 24            | 1             | 0           | 0.585550                | -3.198541 | 1.765384  |
| 25            | 1             | 0           | -1.174052               | -3.036986 | 1.779491  |
| 26            | 6             | 0           | 0.699045                | 2.950419  | 1.378088  |
| 27            | 6             | 0           | 0.256466                | 3.506123  | 0.013953  |
| 28            | 1             | 0           | 1.805297                | 2.892323  | 1.422977  |
| 29            | 1             | 0           | 0.359725                | 3.568313  | 2.224645  |
| 30            | 1             | 0           | -0.738156               | 3.986164  | 0.102534  |
| 31            | 1             | 0           | 0.955605                | 4.257623  | -0.389432 |
| 32            | 5             | 0           | 0.072713                | 1.146994  | 0.018333  |
| 33            | 8             | 0           | 0.205460                | 2.378159  | -0.827500 |
| 34            | 8             | 0           | 0.110389                | 1.677331  | 1.435594  |

## V. $^1\text{H}$ and $^{13}\text{C}$ NMR Spectra

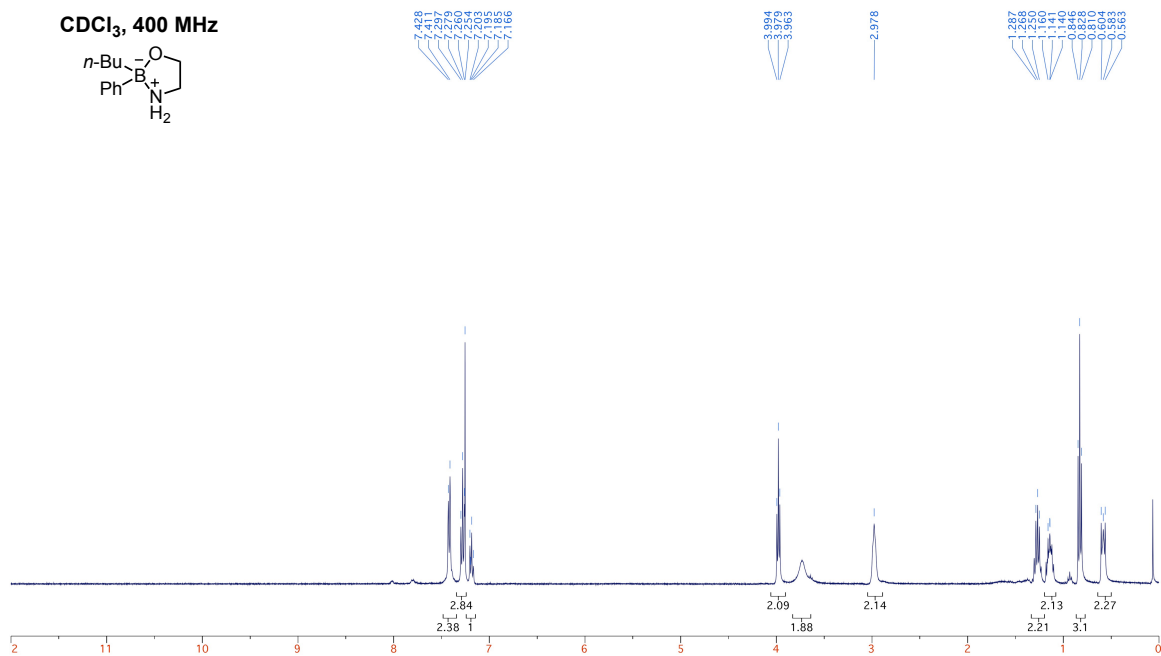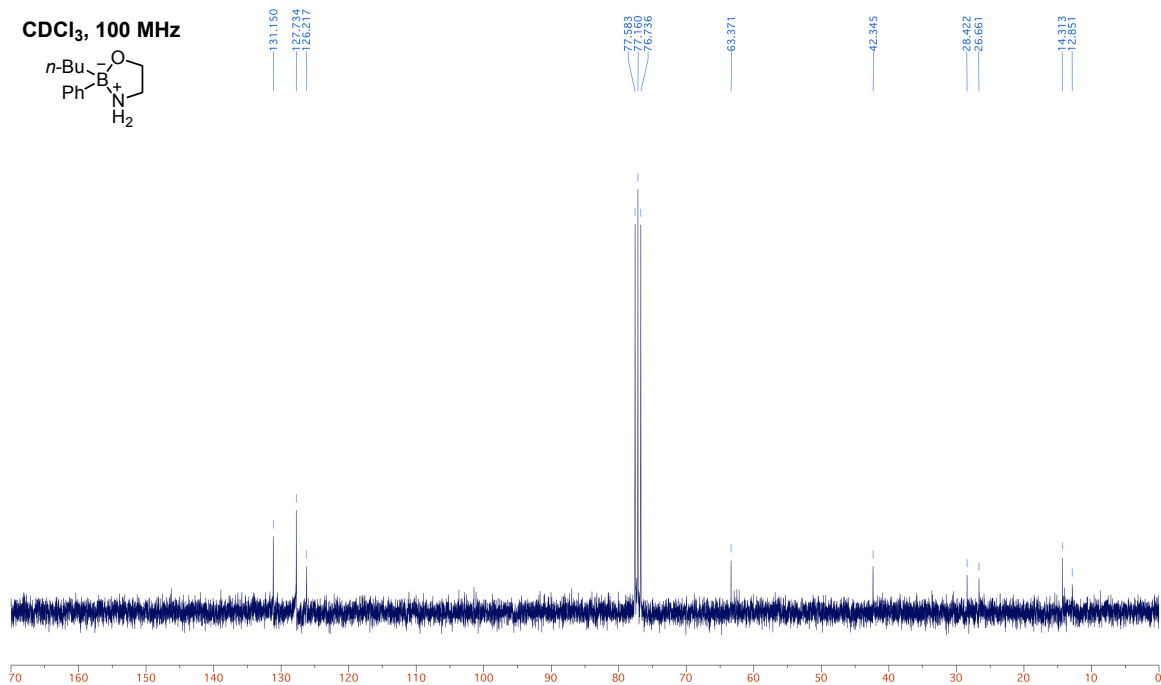

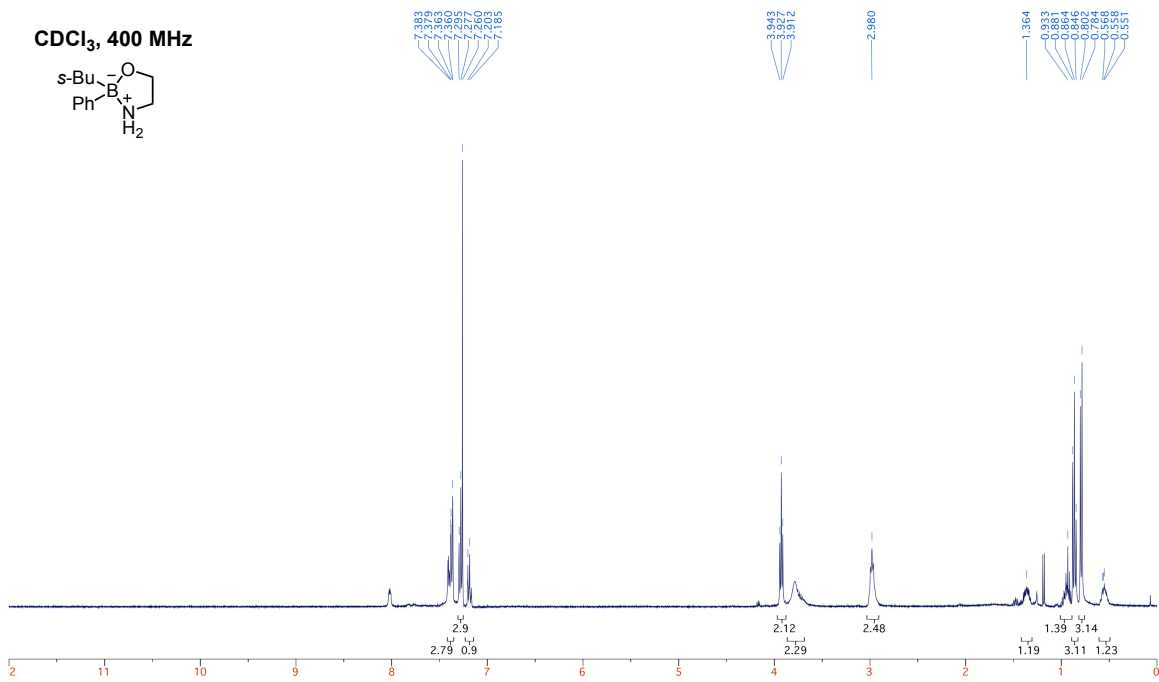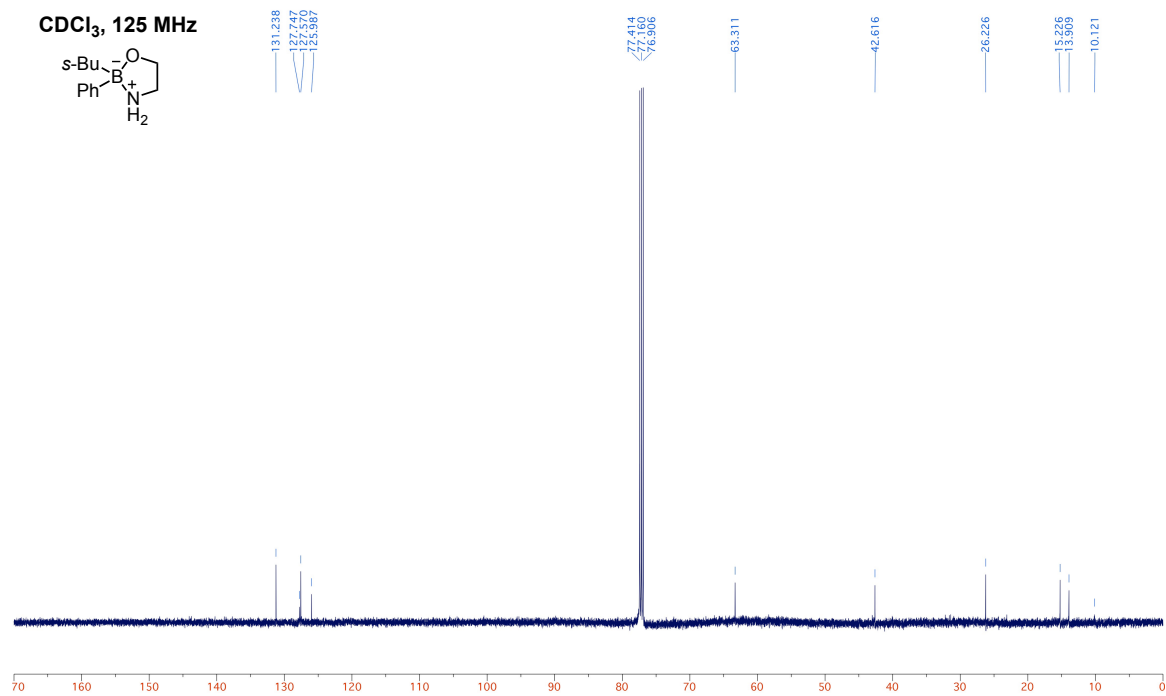

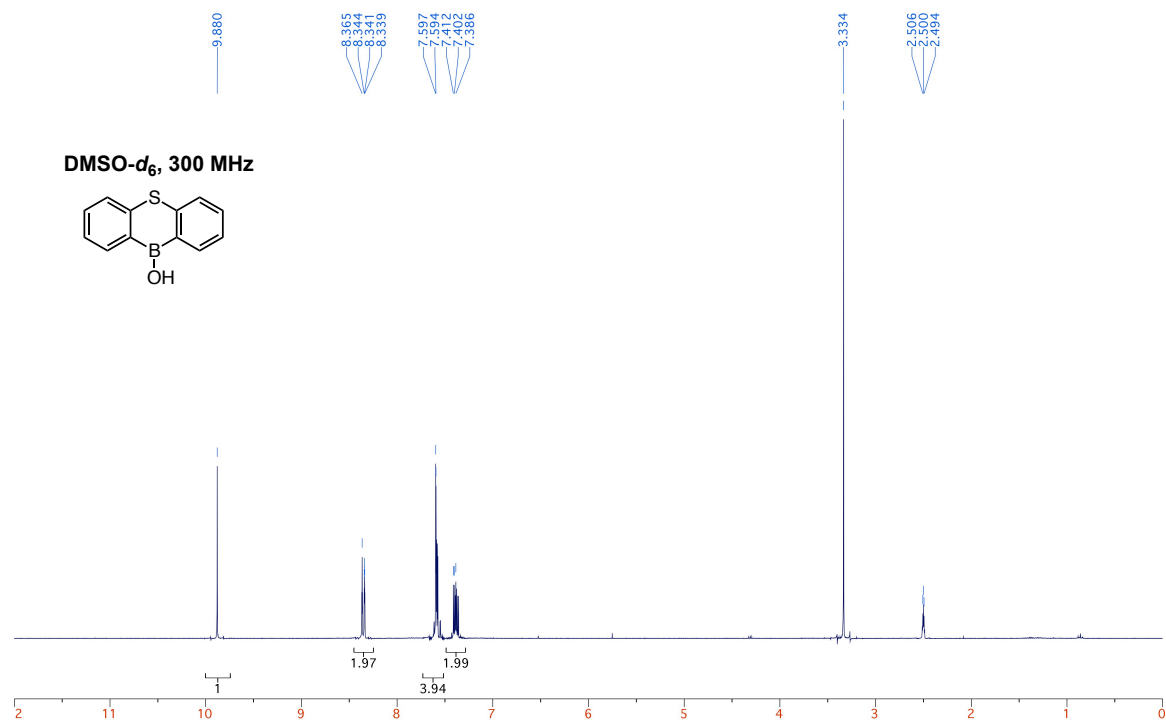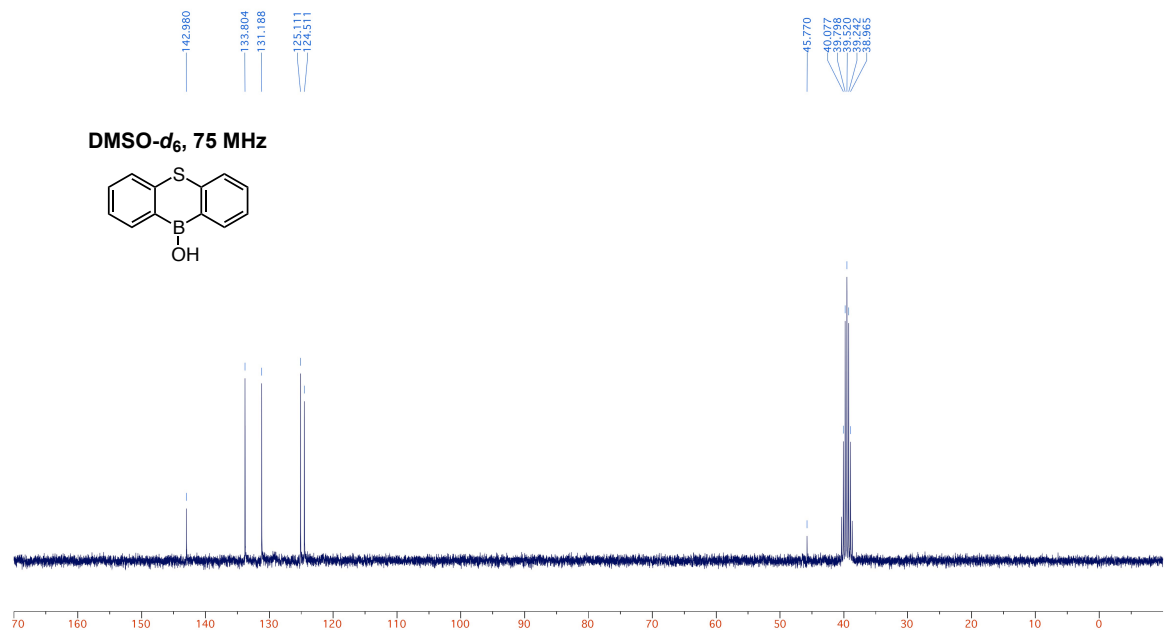

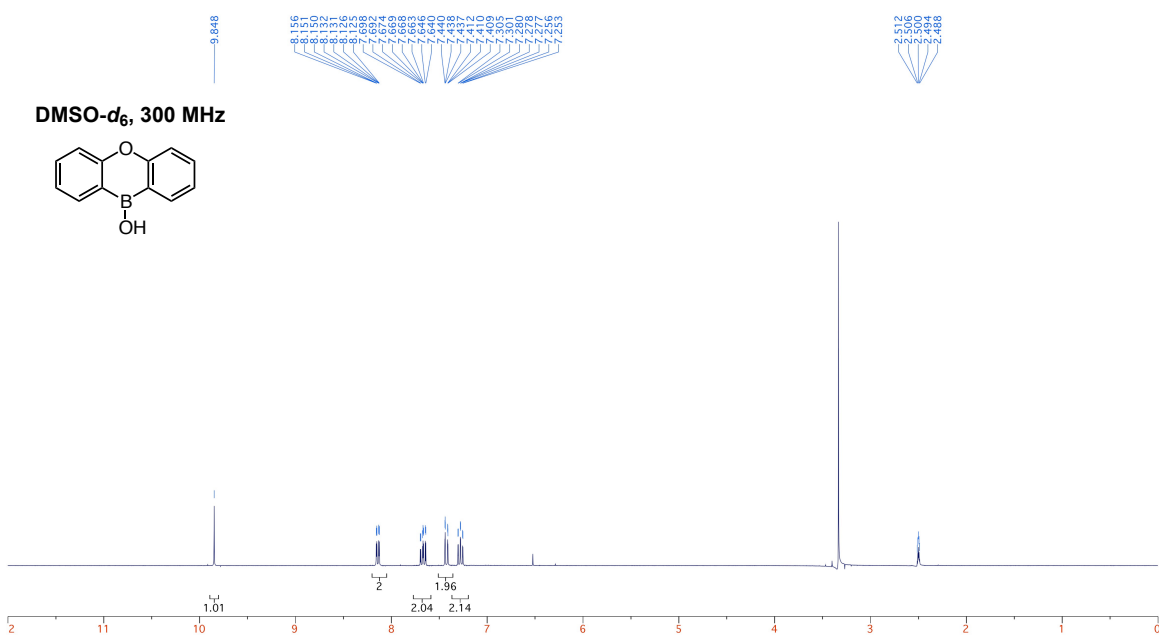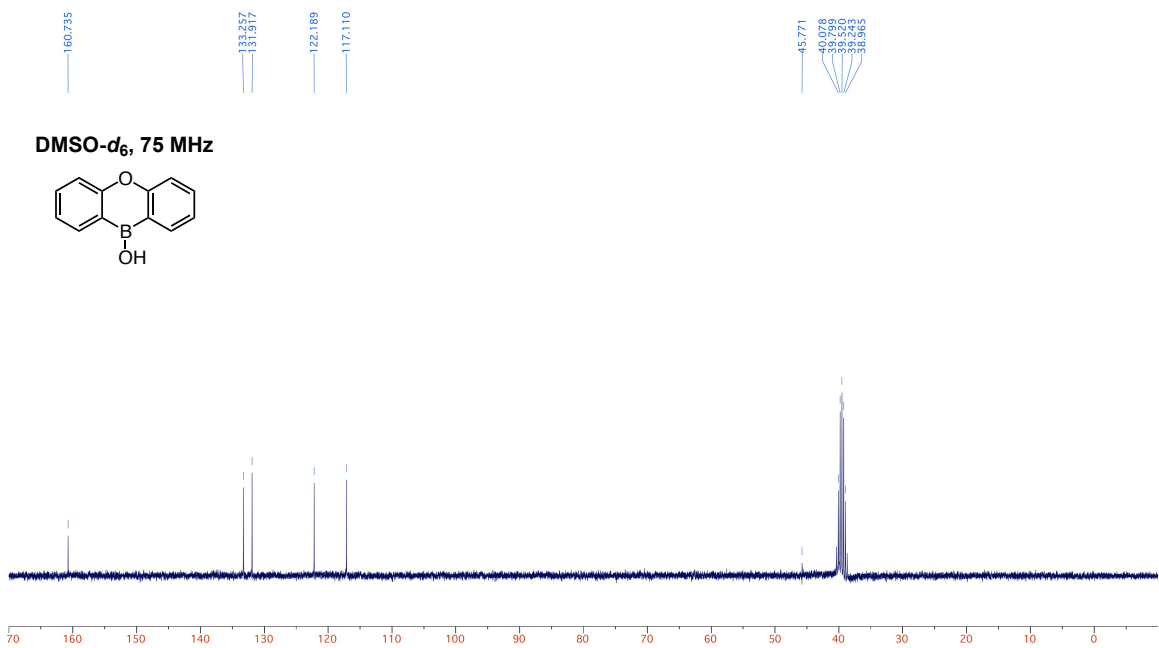

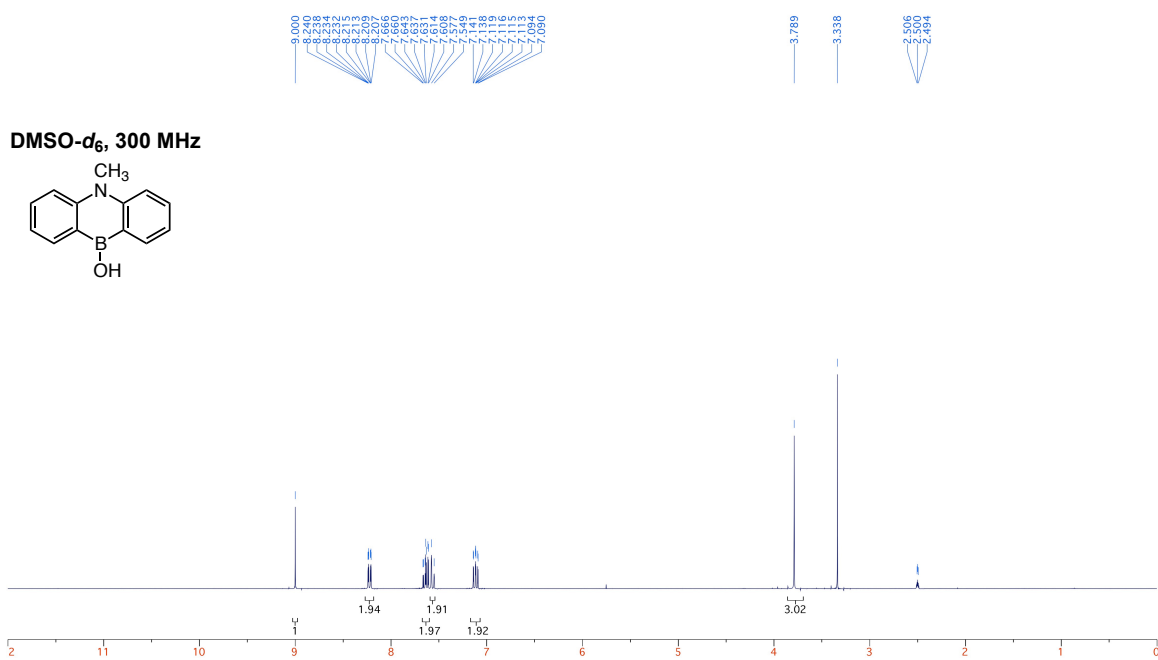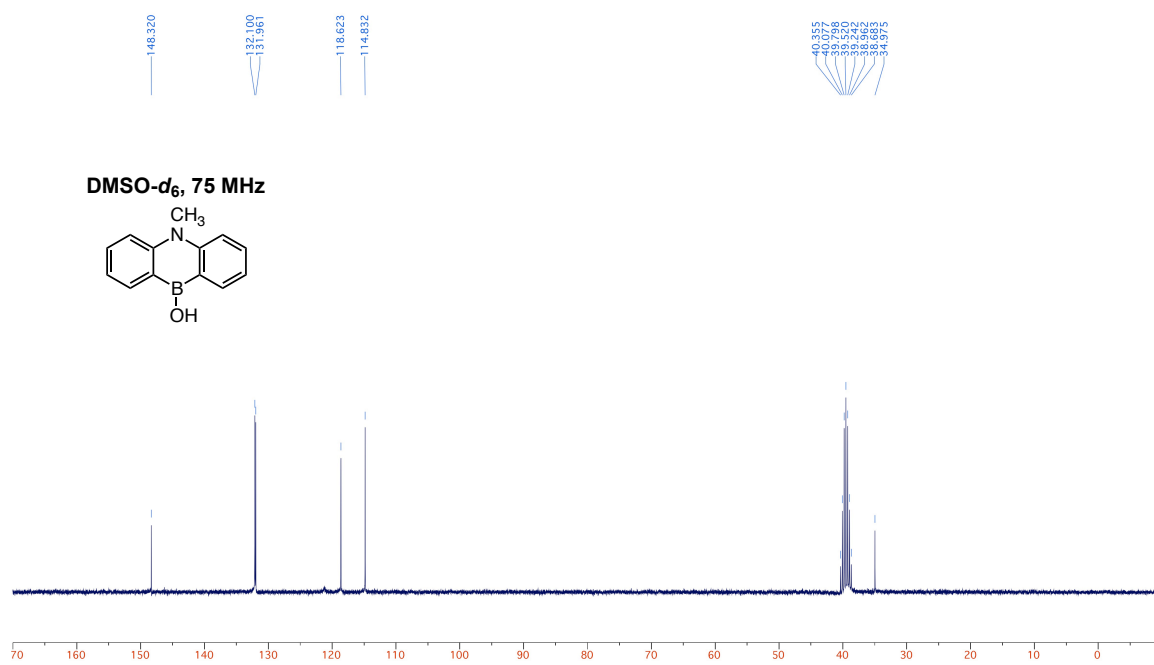



CDCl<sub>3</sub>, 400 MHz

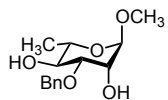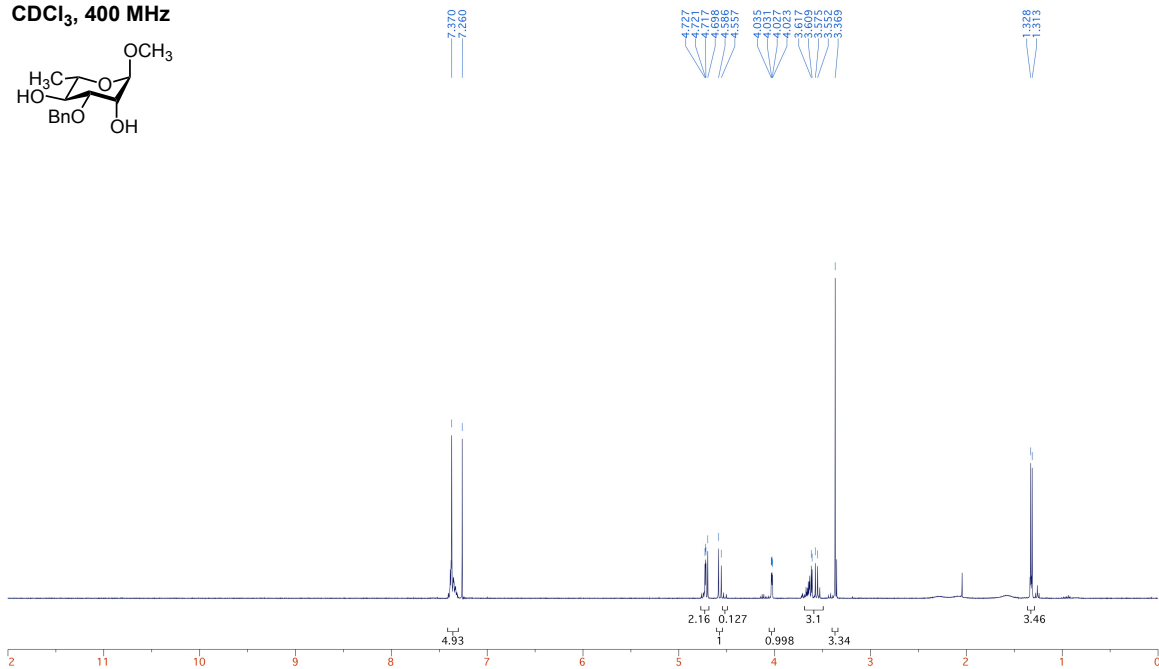

CDCl<sub>3</sub>, 400 MHz

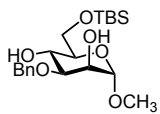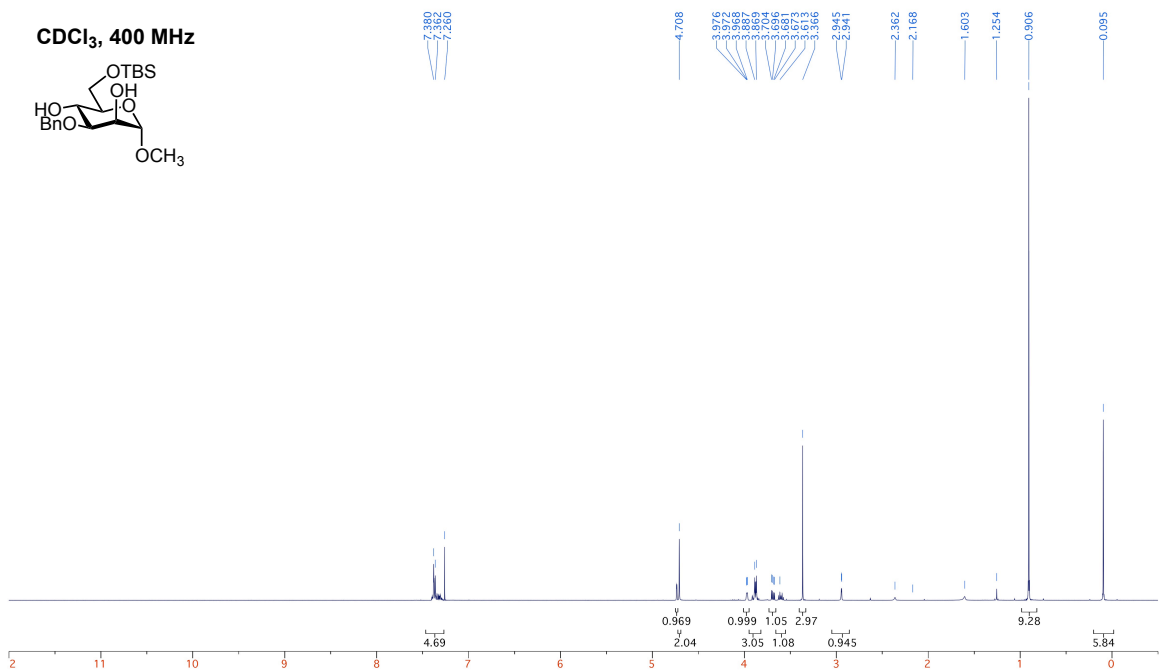

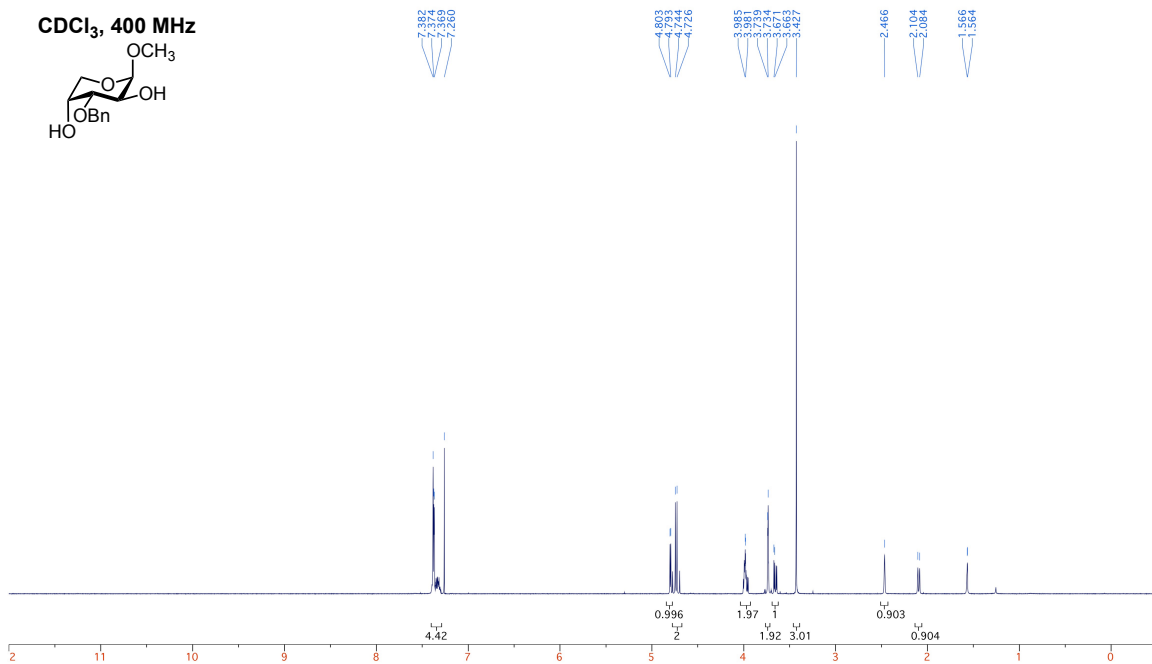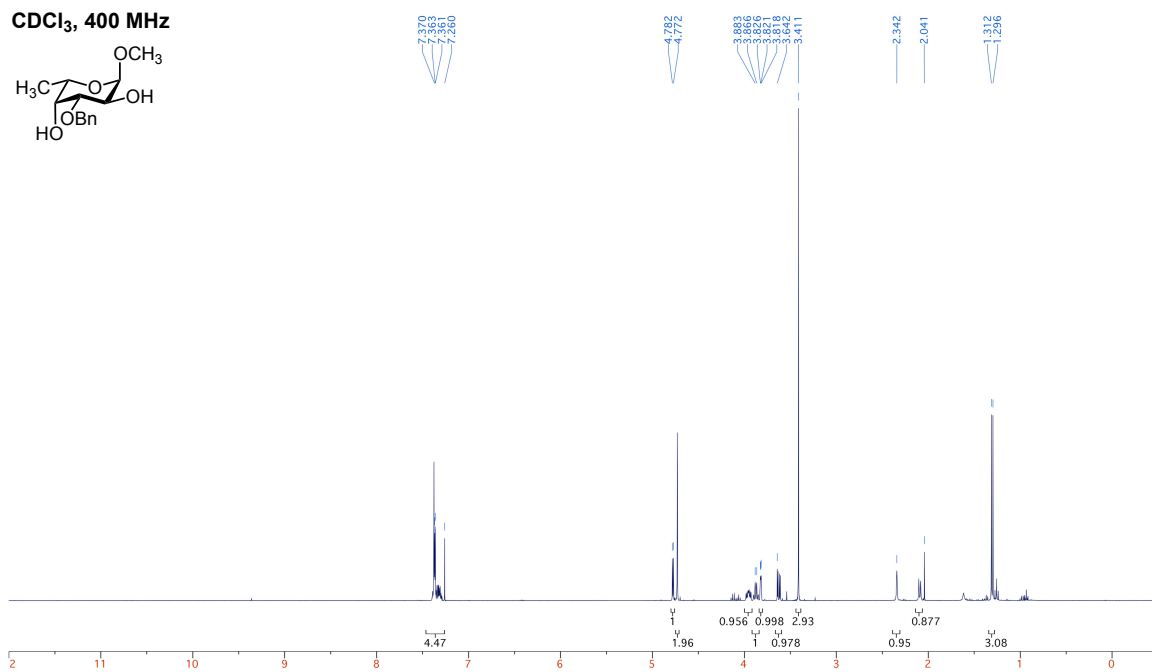

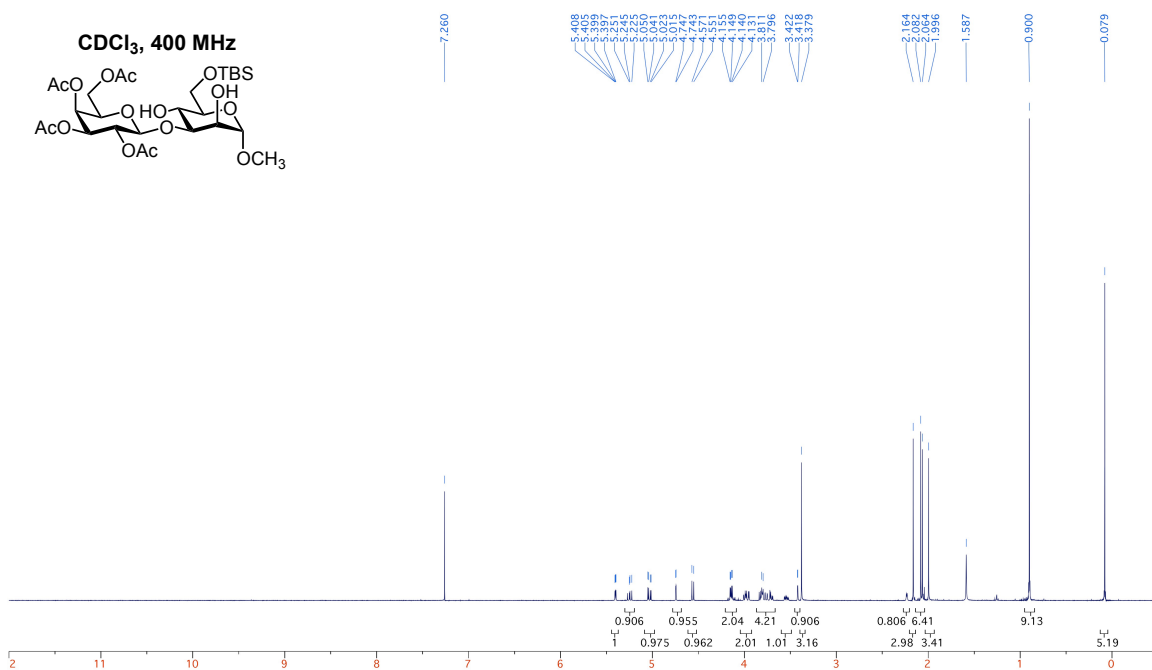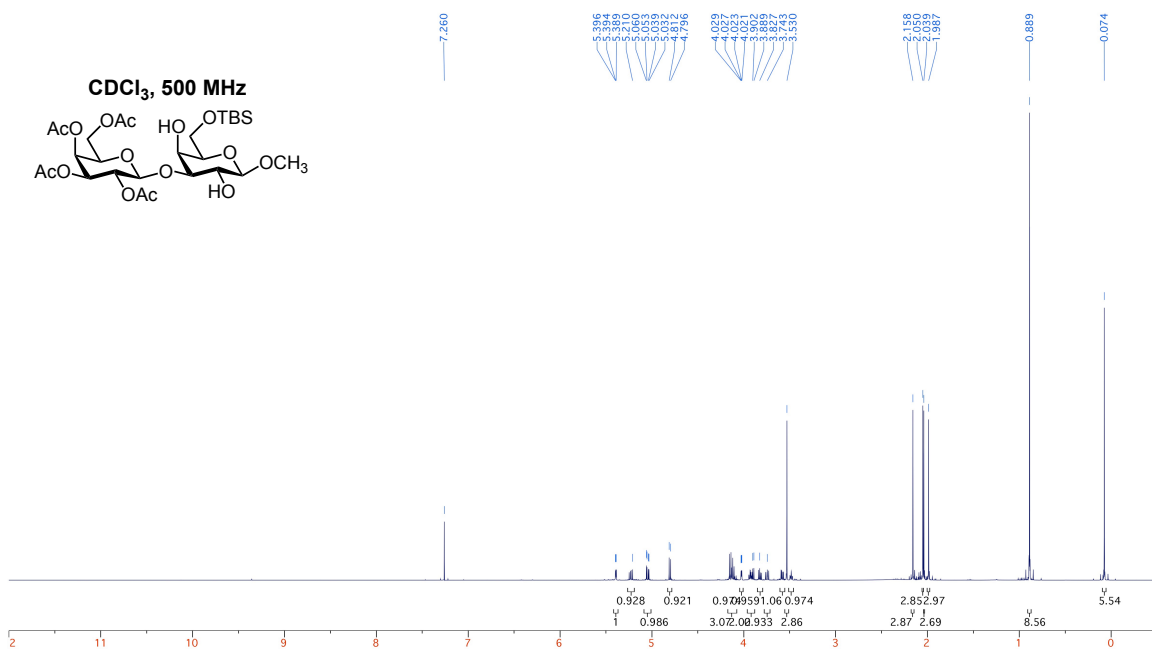

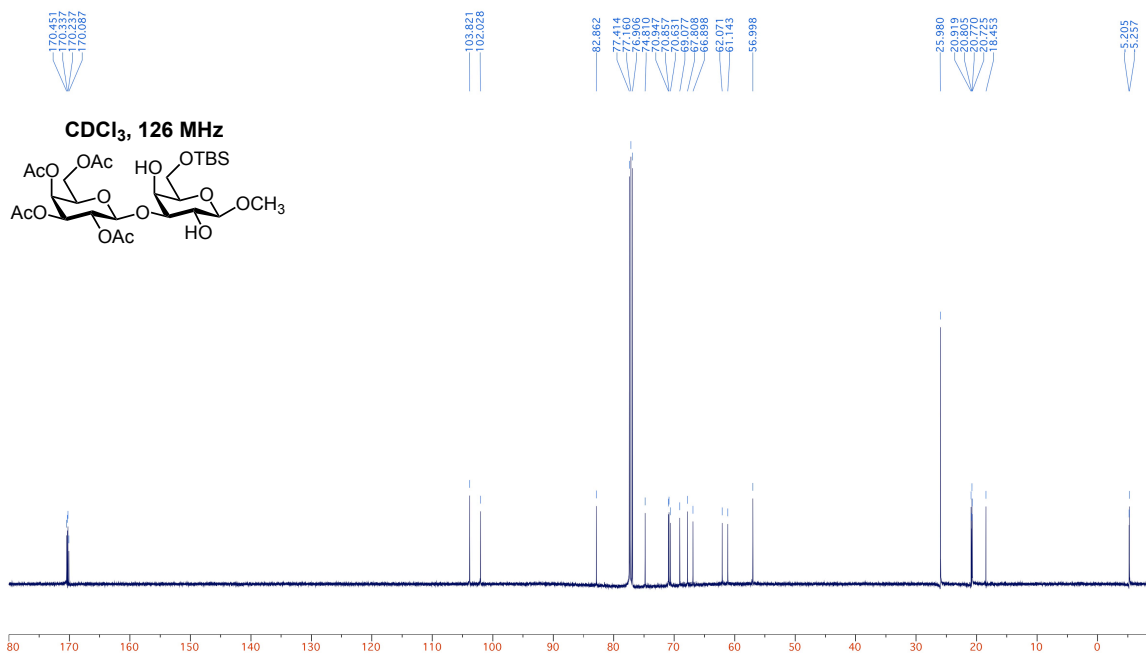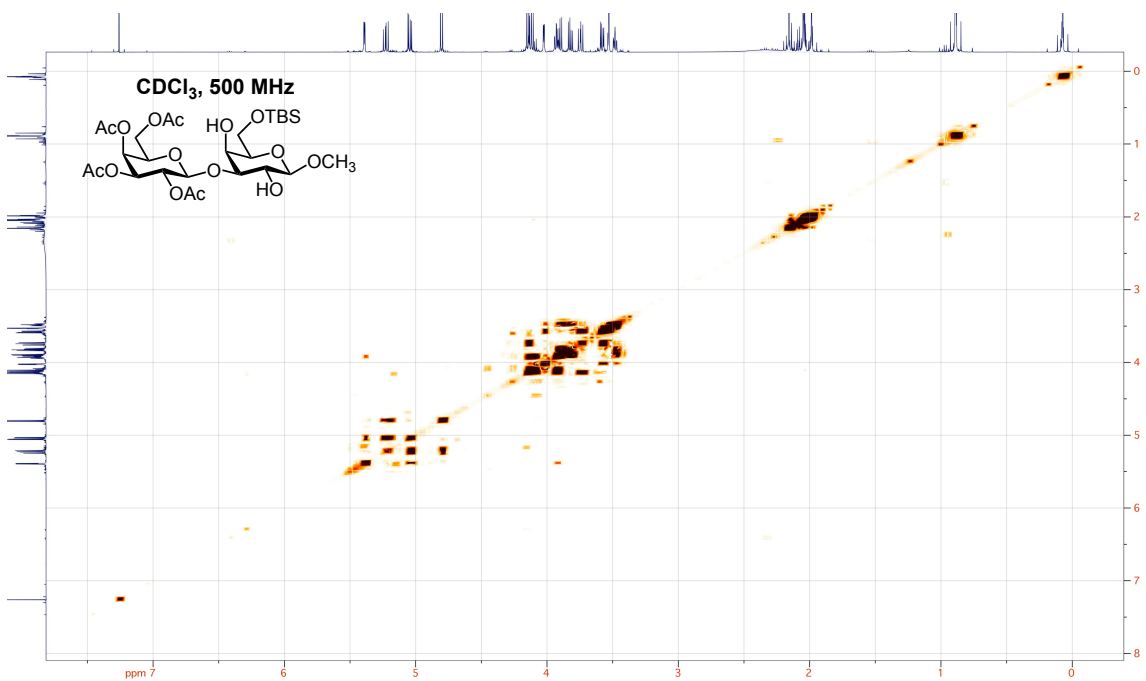

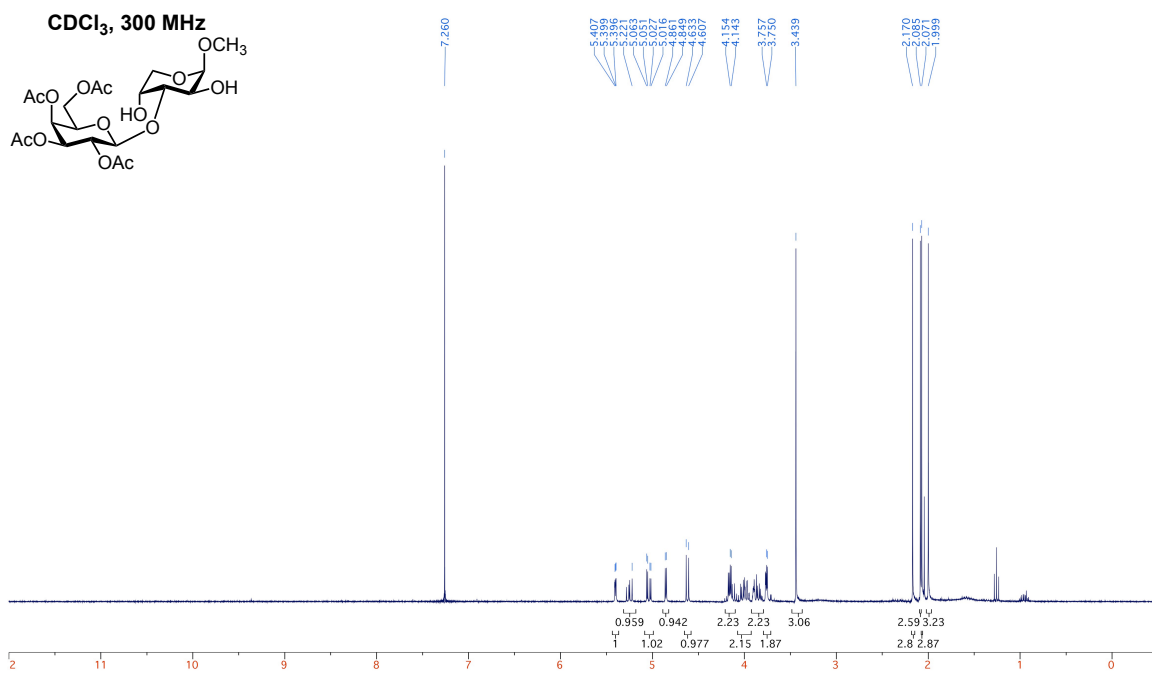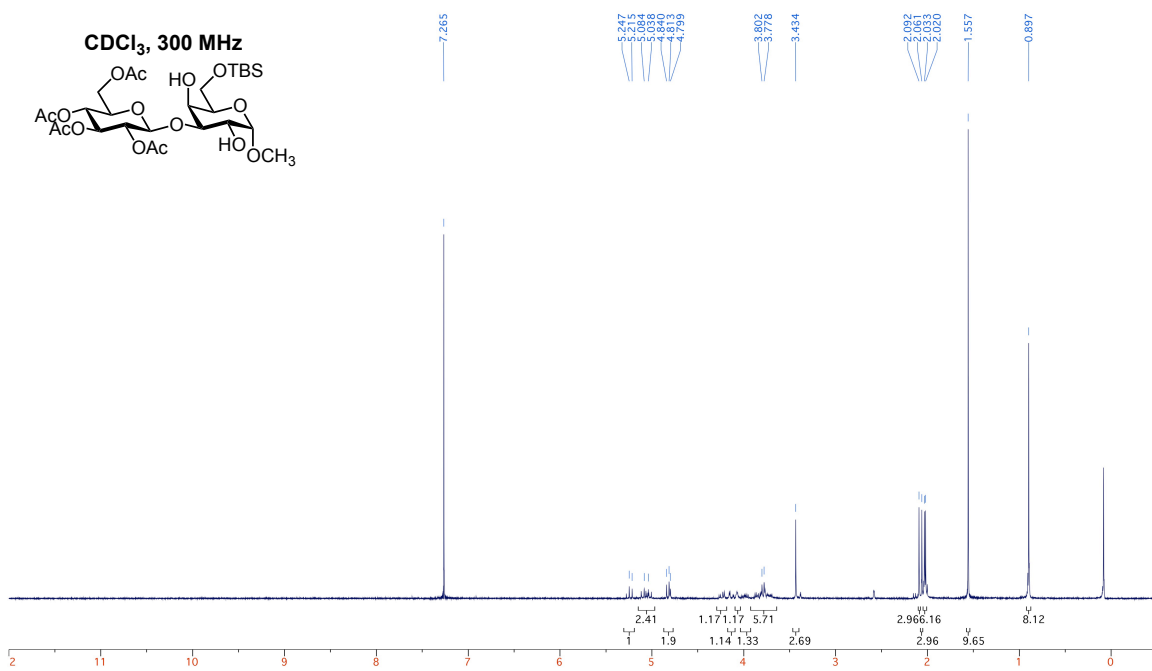

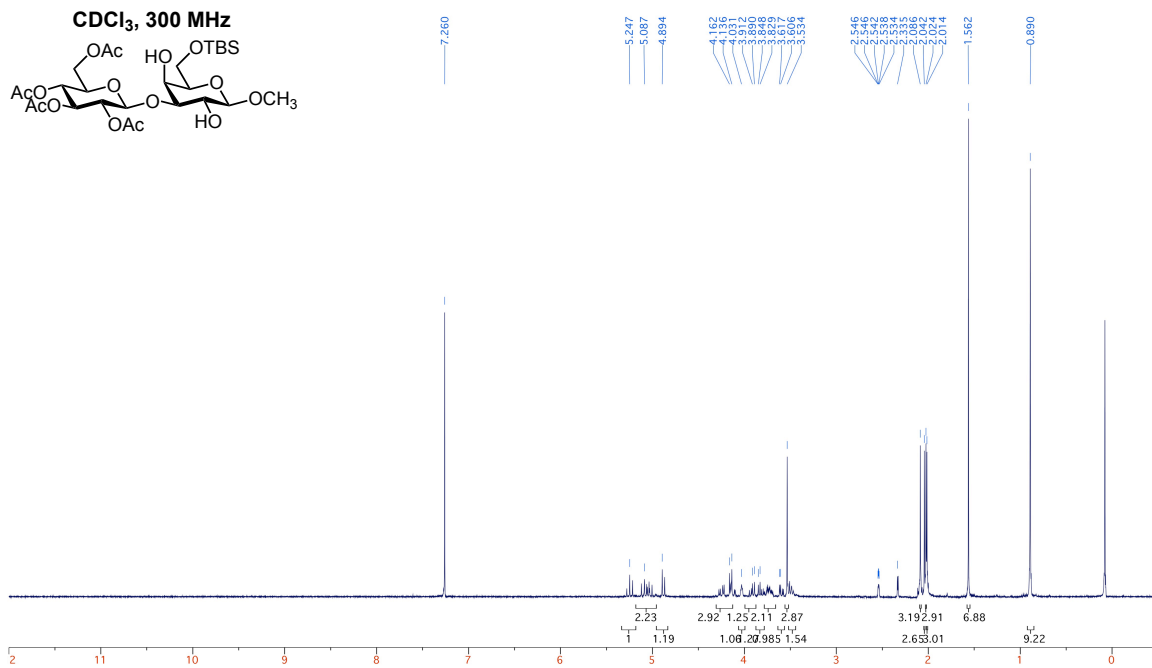

Supplement: c3sc51172c.pdf [file c3sc51172c.pdf]
